1 *Title*

2 **Type 2 and interferon inflammation strongly regulate SARS-CoV-2 related gene**  
3 **expression in the airway epithelium**

4

5

6 *Authors/Affiliations*

7 Satria P. Sajuthi<sup>1#</sup>, Peter DeFord<sup>1#</sup>, Nathan D. Jackson<sup>1</sup>, Michael T. Montgomery<sup>1</sup>,  
8 Jamie L. Everman<sup>1</sup>, Cydney L. Rios<sup>1</sup>, Elmar Pruesse<sup>1</sup>, James D. Nolin<sup>1</sup>, Elizabeth G.  
9 Plender<sup>1</sup>, Michael E. Wechsler<sup>2</sup>, Angel CY Mak<sup>3</sup>, Celeste Eng<sup>3</sup>, Sandra Salazar<sup>3</sup>, Vivian  
10 Medina<sup>4</sup>, Eric M. Wohlford<sup>3,5</sup>, Scott Huntsman<sup>3</sup>, Deborah A. Nickerson<sup>6,7,8</sup>, Soren  
11 Germer<sup>9</sup>, Michael C. Zody<sup>9</sup>, Gonçalo Abecasis<sup>10</sup>, Hyun Min Kang<sup>10</sup>, Kenneth M. Rice<sup>11</sup>,  
12 Rajesh Kumar<sup>12</sup>, Sam Oh<sup>3</sup>, Jose Rodriguez-Santana<sup>4</sup>, Esteban G. Burchard<sup>3,13</sup>, Max A.  
13 Seibold<sup>1,14,15\*</sup>

14

15 <sup>1</sup>Center for Genes, Environment, and Health, National Jewish Health, Denver, CO,  
16 80206 USA; <sup>2</sup>Department of Medicine, <sup>14</sup>Department of Pediatrics, National Jewish  
17 Health, Denver, CO, 80206 USA; <sup>15</sup>Division of Pulmonary Sciences and Critical Care  
18 Medicine, University of Colorado-AMC, Aurora, CO, 80045 USA, <sup>3</sup>Department of  
19 Medicine, <sup>5</sup>Division of Pediatric Allergy and Immunology, <sup>13</sup>Department of  
20 Bioengineering and Therapeutic Sciences University of California San Francisco, San  
21 Francisco, CA; <sup>6</sup>Department of Genome Sciences, University of Washington, Seattle,  
22 WA, USA, <sup>7</sup>Northwest Genomics Center, Seattle, WA, USA <sup>8</sup>Brotman Baty Institute,  
23 Seattle, WA, USA; <sup>9</sup>New York Genome Center, NYC, New York; <sup>10</sup>Center for Statistical

24 Genetics, University of Michigan, Ann Arbor, MI, USA; <sup>11</sup>Department of Biostatistics,  
25 University of Washington, Seattle, WA, USA; <sup>4</sup>Centro de Neumología Pediátrica, San  
26 Juan, Puerto Rico; <sup>12</sup>Ann and Robert H. Lurie Children's Hospital of Chicago,  
27 Department of Pediatrics, Northwestern University, Chicago, Ill #these authors  
28 contributed equally to this work, \*correspondence: seiboldm@njhealth.org

29

30

31 *Abstract*

32

33 Coronavirus disease 2019 (COVID-19) outcomes vary from asymptomatic infection to  
34 death. This disparity may reflect different airway levels of the SARS-CoV-2 receptor,  
35 ACE2, and the spike protein activator, TMPRSS2. Here we explore the role of genetics  
36 and co-expression networks in regulating these genes in the airway, through the  
37 analysis of nasal airway transcriptome data from 695 children. We identify expression  
38 quantitative trait loci (eQTL) for both *ACE2* and *TMPRSS2*, that vary in frequency  
39 across world populations. Importantly, we find *TMPRSS2* is part of a mucus secretory  
40 network, highly upregulated by T2 inflammation through the action of interleukin-13, and  
41 that interferon response to respiratory viruses highly upregulates *ACE2* expression.  
42 Finally, we define airway responses to coronavirus infections in children, finding that  
43 these infections upregulate *IL6* while also stimulating a more pronounced cytotoxic  
44 immune response relative to other respiratory viruses. Our results reveal mechanisms  
45 likely influencing SARS-CoV-2 infectivity and COVID-19 clinical outcomes.

46

47

48

49

50

51

52

53

54 *Introduction*

55

56 In December of 2019, a novel Coronavirus, SARS-CoV-2, emerged in China and has  
57 gone on to trigger a global pandemic of Coronavirus Disease 2019 (COVID-19), the  
58 respiratory illness caused by this virus<sup>1</sup>. While most individuals with COVID-19  
59 experience mild cold symptoms (cough and fever), some develop more severe disease  
60 including pneumonia, which often necessitates mechanical ventilation<sup>2</sup>. In fact, an  
61 estimated 5.7% of COVID-19 illnesses are fatal<sup>3</sup>. Enhanced risk of poor outcomes for  
62 COVID-19 has been associated with a number of factors including advanced age, male  
63 sex, and underlying cardiovascular and respiratory conditions<sup>4, 5</sup>. Yet, while the majority  
64 of serious COVID-19 illness occurs in adults over 60, children are also thought to be  
65 highly susceptible to infection. Moreover, recent data suggest that 38% of COVID-19  
66 cases occurring in children are of moderate severity and 5.8% are severe or critical<sup>6</sup>,  
67 highlighting a need for studying risk factors of illness in this population as well.

68

69 One factor that may underlie variation in clinical outcomes of COVID-19 is the extent of  
70 gene expression in the airway of the SARS-CoV-2 entry receptor, *ACE2*, and  
71 *TMPRSS2*, the host protease that cleaves the viral spike protein and thus allows for  
72 efficient virus-receptor binding<sup>7</sup>. Expression of these genes and their associated  
73 programs in the nasal airway epithelium is of particular interest given that the nasal  
74 epithelium is the primary site of infection for upper airway respiratory viruses, including  
75 coronaviruses, and acts as the gateway through which upper airway infections can  
76 spread into the lung. The airway epithelium is composed of multiple resident cell types

77 (e.g., mucus secretory, ciliated, basal stem cells, and rare epithelial cell types)  
78 interdigitated with immune cells (e.g. T cells, mast cells, macrophages), and the relative  
79 abundance of these cell types in the epithelium can greatly influence the expression of  
80 particular genes<sup>8-10</sup>, including *ACE2* and *TMPRSS2*. Furthermore, since the airway  
81 epithelium acts as a sentinel for the entire respiratory system, its cellular composition,  
82 along with its transcriptional and functional characteristics, are significantly shaped by  
83 interaction with environmental stimuli. These stimuli may be inhaled (e.g., cigarette  
84 smoke, allergens, microorganisms) or endogenous, such as when signaling molecules  
85 are produced by airway immune cells present during different disease states. One such  
86 disease state is allergic airway inflammation caused by type 2 (T2) cytokines (IL-4, IL-5,  
87 IL-13), which is common in both children and adults and has been associated with the  
88 development of both asthma and COPD in a subgroup of patients<sup>11-13</sup>. T2 cytokines are  
89 known to greatly modify gene expression in the airway epithelium, both through  
90 transcriptional changes within cells and epithelial remodeling in the form of mucus  
91 metaplasia<sup>11, 14, 15</sup>. Microbial infection is another strong regulator of airway epithelial  
92 expression. In particular, respiratory viruses can modulate the expression of thousands  
93 of genes within epithelial cells, while also recruiting and activating an assortment of  
94 immune cells<sup>16-18</sup>. Even asymptomatic nasal carriage of respiratory viruses, which is  
95 especially common in childhood, has been shown to be associated with both genome-  
96 wide transcriptional re-programming and infiltration of macrophages and neutrophils in  
97 the airway epithelium<sup>19</sup>, demonstrating how viral infection can drive pathology even  
98 without overt signs of illness.

99

100 Genetic variation is another factor that may regulate gene expression in the airway  
101 epithelium. Indeed, expression quantitative trait loci (eQTL) analyses carried out in  
102 many tissues have suggested that as many as 70% of genes expressed by a tissue or  
103 organ are under genetic control<sup>20</sup>. Severity of human rhinovirus (HRV) respiratory illness  
104 has specifically been associated with genetic variation in the epithelial genes *CDHR3*<sup>21</sup>  
105 and the *ORMDL3*<sup>22</sup> and, given differences in genetic variation across world populations,  
106 it is possible that functional genetic variants in SARS-CoV-2-related genes could partly  
107 explain population differences in COVID-19 clinical outcomes.

108  
109 Finally, there are important questions regarding the host response to SARS-CoV-2  
110 infection. For example, it is unclear whether specific antiviral defenses in the epithelium  
111 are blocked by SARS-CoV-2 or whether the virus may trigger epithelial or immune cell  
112 pathways that prolong airway infection, and/or even incite a hyperinflammatory state in  
113 the lungs in some individuals that leads to more severe disease. Although large cohorts  
114 of subjects infected by the novel coronavirus are still lacking, much can be learned by  
115 exploring transcriptional responses to other coronavirus strains. In particular, because  
116 nasal airway brushings capture both epithelial and immune cells present at the airway  
117 surface, such samples collected from a cohort of subjects infected by a range of viruses  
118 provide an opportunity to comprehensively investigate the potentially varied and  
119 cascading effects of coronavirus infection on airway expression and function.

120  
121 In this study, we first use single cell RNA-sequencing (scRNA-seq) to elucidate the  
122 cellular distribution of *ACE2* and *TMPRSS2* expression in the nasal airway epithelium.

123 We also perform network and eQTL analysis of bulk gene expression data on nasal  
124 airway epithelial brushings collected from a large cohort of asthmatic and healthy  
125 children in order to identify the genetic and biological regulatory mechanisms governing  
126 *ACE2* and *TMPRSS2* expression. We then use multi-variable modeling to estimate the  
127 relative contribution of these factors to population variation in the expression of these  
128 two genes, and by performing experiments on mucociliary airway epithelial cultures  
129 confirm a dominant role for both T2 inflammation and viral infection in regulating  
130 expression of *ACE2* and *TMPRSS2*. Finally, we define the cellular and transcriptional  
131 responses to *in vivo* coronavirus infections in the nasal airway of children.

132

133

134

135

136

137

138

139

140

141

142

143

144

145

146 *Results*

147

148 ***ACE2* and *TMPRSS2* are expressed by multiple nasal airway epithelial cell types**

149

150 We first examined *ACE2* and *TMPRSS2* expression at a cell type level through single  
151 cell RNA sequencing (scRNA-seq) of a nasal airway epithelial brushing from an  
152 asthmatic subject. Shared Nearest Neighbor (SNN)-based clustering of 8,291 cells  
153 identified 9 epithelial and 3 immune cell populations (Figure 1a, Supplementary Table  
154 1). We found that 7 epithelial cell populations contained *ACE2*<sup>+</sup> cells (at low frequency),  
155 with the highest frequency of positive cells found among basal/early secretory cells,  
156 ciliated cells, and secretory cells (Figure 1b). We did not observe meaningful *ACE2*  
157 expression among any of the immune cell populations, which included T cells, dendritic  
158 cells, and mast cells. We found *TMPRSS2* to be expressed by all epithelial cell types,  
159 with a higher frequency of positive cells among the different cell types, compared to  
160 *ACE2* (Figure 1b,c). A small number of mast cells were also *TMPRSS2*<sup>+</sup> (Figure 1c).

161

162

163 ***TMPRSS2* is part of a mucus secretory co-expression network highly induced by**  
164 **T2 inflammation**

165

166 We next sought to determine the variation in nasal epithelial expression of *ACE2* and  
167 *TMPRSS2* across healthy and asthmatic children, and to identify biological mechanisms  
168 that regulate this variation. Thus, we performed weighted gene co-expression network



169 analysis (WGCNA) on whole transcriptome sequencing data from nasal airway  
170 brushings of 695 Puerto Rican healthy and asthmatic children in the Genes-  
171 Environments and Asthma in Latino Americans II study (GALA II). This analysis  
172 identified 54 co-expression networks representing cell type-specific expression  
173 programs such as ciliogenesis, mucus secretion, and pathways of immunity and airway  
174 inflammation (Supplementary Table 2). The *TMPRSS2* gene was contained within one  
175 of a set of three highly correlated networks exhibiting strong enrichments for mucus  
176 secretory cell genes and pathways (Figure 2a, Supplementary Table 2,3). For example,  
177 the black network, which was highly correlated with *TMPRSS2* expression ( $r=0.64$ ,  
178  $p=1e-82$ ), was strongly enriched for *Golgi mediated transport* and *COPI-dependent*  
179 *Golgi to ER transport* pathways, both of which are involved in the normal processing  
180 and transport of mucin proteins (Figure 2a). *TMPRSS2* itself fell within and was highly  
181 correlated with expression of the pink network ( $r=0.68$ ,  $p=3e-97$ ), which was highly  
182 enriched for *mucus goblet cell* markers ( $p=2e-6$ , Figure 2a,b). The pink network was  
183 also enriched for genes involved in the *O-linked glycosylation of mucins* pathway ( $p=9e-$   
184  $4$ ), which is vital to the function of mucus secretory cells, especially those induced by T2  
185 inflammation ( $r=0.68$ ,  $p=3e-97$ , Figure 2a,b). In fact, we found that this network  
186 contained the T2 cytokine *IL13* while being particularly enriched for genes known to  
187 mark and transcriptionally regulate IL-13-induced mucus metaplasia (*FCGBP*, *SPDEF*,  
188 *FOXA3*). The saddle brown network was also related to mucus secretory cells, and  
189 contained the most canonical T2 inflammation markers<sup>11, 23</sup> including *POSTN*, *CLCA1*,  
190 *CPA3*, *IL1RL1*, *CCL26*, and was strongly correlated with both *TMPRSS2* ( $r=0.61$ ,  $p=5e-$   
191  $72$ , Figure 2c) and the other T2 mucus secretory network (pink) ( $r=0.92$ ,  $p=3e-280$ ,

192 Supplementary Table 4). In contrast, we found *ACE2* expression to be strongly  
193 negatively correlated with expression of both T2 networks (pink:  $r=-0.61$ ,  $p=3e-72$ ,  
194 saddle brown:  $r=-0.7$ ,  $p=2e-102$ , Figure 2e,f). To identify subjects with high and low T2  
195 inflammation, we hierarchically clustered all subjects based on the expression of genes  
196 in the canonical T2 network (saddle brown). This resulted in the identification of two  
197 distinct groups we labeled as T2-high ( $n=364$ ) and T2-low ( $n=331$ ) (Supplementary  
198 Figure 1a). We found that this expression-derived T2 status was strongly associated  
199 with traits known to be driven by T2 inflammation including IgE levels, exhaled nitric  
200 oxide (FeNO), blood eosinophils, and asthma diagnosis (Supplementary Figure 1b-e).  
201 Notably, *TMPRSS2* levels were 1.3-fold higher in T2-high subjects ( $p=1e-62$ ), while,  
202 *ACE2* expression was 1.4-fold lower in T2-high subjects ( $p=2e-48$ ) (Figure 2d,g).

203  
204 To investigate whether the strong *in vivo* relationship between airway T2 inflammation  
205 and *TMPRSS2/ACE2* expression is causal in nature, we performed *in vitro* stimulation  
206 of paired air-liquid interface (ALI) mucociliary airway epithelial cultures with 72 hours of  
207 IL-13 or mock stimulus ( $n=5$  donors, Figure 3a). Performing paired differential  
208 expression analysis between the mock and IL-13 stimulated cultures, we found that  
209 *ACE2* and *TMPRSS2* were strongly down- and up-regulated, respectively, supporting  
210 our *in vivo* analysis results ( $\log_2FC= -0.67$ ,  $p=5e-3$ ,  $\log_2FC= 1.20$ ,  $p=5e-9$ , Figure 3b,c).  
211 To better understand the cellular basis of *TMPRSS2* and *ACE2* regulation by IL-13, we  
212 leveraged scRNA-seq data previously generated on tracheal airway epithelial cultures  
213 that were chronically stimulated (10 days) with IL-13 or control media (Figure 3a,d).  
214 Similar to our results from *in vivo* nasal scRNA-seq data, we observed that *ACE2*

215 expression was highest among basal, ciliated, and early/intermediate secretory cell  
216 populations, with *ACE2* being significantly downregulated by IL-13 among both basal  
217 and intermediate secretory cells (Figure 3e). Also mirroring the *in vivo* scRNA-seq data,  
218 *TMPRSS2* was expressed across all epithelial cell types, but at a higher frequency  
219 among secretory cells (Figure 3f). IL-13 stimulation induced dramatic upregulation of  
220 *TMPRSS2* in early secretory, intermediate secretory, and mature mucus secretory cell  
221 populations (Figure 3f). Furthermore, IL-13 stimulated mucus metaplasia that resulted in  
222 the development of a novel mucus secretory cell type and an IL-13 inflammatory  
223 epithelial cell that both highly expressed *TMPRSS2* (Figure 3f). Together, our *in vivo*  
224 and *in vitro* analyses strongly suggest that *TMPRSS2* is part of a mucus secretory cell  
225 network that is highly induced by IL-13-mediated T2 inflammation.

226  
227

228

229

230 ***ACE2* belongs to an interferon response network that is induced by respiratory**  
231 **virus infections**

232

233 Returning to the *in vivo* nasal airway epithelial expression networks, we found that  
234 *ACE2* expression was highly correlated with expression of two networks (purple and  
235 tan) (purple:  $r=0.74$ ,  $p=3e-120$ , tan:  $r=0.72$ ,  $p=2e-110$ , Figure 4a,b). The purple network  
236 was highly enriched for genes that mark cytotoxic T cells and antigen-presenting  
237 dendritic cells, both of which are particularly abundant in a virally infected epithelium  
238 (Figure 4c, Supplementary Table 2), whereas the tan network was strongly enriched for

239 interferon and other epithelial viral response genes (*IFI6*, *IRF7*, *CXCL10*, *CXCL11*)  
240 (Figure 4c, Supplementary Table 2). Clustering of subjects based on the interferon  
241 response network genes resulted in two groups, one highly (interferon-high=78) and  
242 one lowly (interferon-low=617) expressing these interferon response network genes  
243 (Supplementary Figure 2). We found that *ACE2* expression was 1.7-fold higher in the  
244 interferon-high vs. interferon-low group (Figure 4d). In a previous study, we found that  
245 children with nasal gene expression characteristic of the interferon network tended to be  
246 infected with a respiratory virus, despite being asymptomatic<sup>19</sup>. To explore the  
247 possibility of this relationship in our current dataset, we metagenomically analyzed the  
248 RNA-seq data for all subjects to identify those harboring reads for a respiratory virus.  
249 This analysis found that 18% of GALA II children were asymptotically harboring a  
250 respiratory virus from one of eight general respiratory virus groups (Figure 4e).  
251 Strikingly, we found that 78% of interferon-high subjects were virus carriers compared to  
252 only 10% of interferon-low subjects. These results demonstrate how asymptomatic virus  
253 carriage nonetheless stimulates an active viral response that includes *ACE2*.  
254  
255 To directly test the effect of respiratory virus infection on epithelial *ACE2* gene  
256 expression we again employed our ALI mucociliary epithelial culture system. Performing  
257 mock or human rhinovirus-A16 infection of mature cultures (Day 27, Figure 4f) from 5  
258 donors we found 7.7-fold upregulation of *ACE2* gene expression with HRV-A infection  
259 ( $p=1.3e-51$ , Figure 4g). In contrast, we only observed a trend for down regulation of  
260 *TMPRSS2* gene expression among virally infected subjects (Figure 4h). These results  
261 confirm the strong regulation of *ACE2* gene expression by viral infection.

262

263 **Genetic determinants of *ACE2* and *TMPRSS2* expression in the nasal airway**  
264 **epithelium**

265

266 We next explored the role of genetic regulatory variants in helping to drive epithelial  
267 expression of *ACE2* and *TMPRSS2*. To do this, we performed cis-eQTL analysis for  
268 these two genes, using nasal gene expression and genome-wide genetic variation data  
269 collected from the GALA II study children. We identified 316 and 36 genetic variants  
270 significantly associated with expression of *ACE2* and *TMPRSS2*, respectively (Figure  
271 5a,b). Stepwise forward-backward regression analysis of these eQTL variants revealed  
272 a single independent eQTL variant (rs181603331) for the *ACE2* gene ( $6e-23$ ), located  
273 ~20kb downstream of the transcription start site (Figure 5a). This rare eQTL variant  
274 (allele frequency [AF]=1%) was associated with a large decrease in *ACE2* expression  
275 ( $\log_2 A_{FC} = -1.6$ ) (Figure 5c).

276 Similar analysis of the *TMPRSS2* eQTL variants yielded three independent eQTL  
277 variants (rs1475908 AF=20%, rs74659079 AF=4%, and rs2838057 AF=13%, Figure  
278 5b). The eQTL variant rs1475908 was associated with a decrease in *TMPRSS2*  
279 expression ( $\log_2 A_{FC} = -0.37$ , Figure 5d), whereas both the rs74659079 and rs2838057  
280 eQTL variants were associated with increased *TMPRSS2* expression ( $\log_2 A_{FC} = 0.38$ ,  
281 0.43, respectively, Supplementary Figure 3).

282

283 Examining the frequency of these eQTL variants among eight world populations listed in  
284 the gnomAD genetic variation database (v2.1.1), we found that the *ACE2* eQTL variant

285 was only present in people of African descent and at a low frequency (AF=0.7%, Figure  
286 5e). In contrast, the *TMPRSS2* eQTL variant associated with decreased expression,  
287 rs1475908, occurred across all world populations, with the highest allele frequencies  
288 among East Asians (AF=38%), Europeans (AF=35%), intermediate frequencies among  
289 Africans (AF=26%) and Ashkenazi Jews (AF=23%), and the lowest frequency among  
290 Latinos (AF=17%). The two *TMPRSS2* eQTL variants associated with increased  
291 expression exhibited much more disparate allele frequencies across world populations.  
292 Namely, the allele frequency of rs74659079 is above 1% only among people of African  
293 descent (AF=11%) and 4% in the participating Puerto Rican population. Likewise, the  
294 rs2838057 eQTL variant, which was associated with increased *TMPRSS2* expression  
295 was present at a frequency of 32% in East Asians, 20% in Latinos, and <10% in all  
296 other world populations. Together, these results suggest that if *TMPRSS2* levels  
297 influence susceptibility to SARS-CoV-2, then genetics may play a significant role in  
298 infection risk and that this risk will vary significantly across world populations.

299

300

### 301 **Multi-variable modeling of airway *ACE2* and *TMPRSS2* gene expression**

302

303 Our analyses indicate that T2 inflammation, interferon/viral response signaling, and  
304 genetics are all determinants of *ACE2* and *TMPRSS2* gene expression in the airway  
305 epithelium of children. Therefore, we next sought to determine the relative importance of  
306 these factors in determining levels of these genes using multi-variable regression  
307 analysis. We included asthma status, age, and sex as model covariates since chronic

308 lung disease, increasing age, and male sex have all been associated with increased risk  
309 of poor COVID-19 illness outcomes. Modeling *ACE2* expression among GALA II  
310 children, we found that T2 and interferon statuses had the strongest effects on *ACE2*  
311 expression ( $p=1.6e-57$ ,  $p=6.5e-43$ , respectively), with T2-low and interferon-high  
312 individuals exhibiting the highest levels of expression. These two variables  
313 independently explained 24% and 17% of the variance in *ACE2* expression (Table 1).  
314 While the *ACE2* eQTL variant, rs181603331, was associated with a notable decrease in  
315 *ACE2* levels, it only accounted for 1.2% of the variance, reflecting the low frequency of  
316 this variant in our population. Increasing age and asthma diagnosis were both  
317 associated with small decreases in *ACE2* expression, although both variables  
318 accounted for less than 2% of the variance, and sex was not a significant predictor  
319 (Table 1).

320  
321 Similar modeling of *TMPRSS2* expression found that T2-high status dramatically  
322 increased expression, with an effect size 5.4x larger than any other variable, capturing  
323 33% of total variation in *TMPRSS2* (Table 1). While statistically significant, the two  
324 *TMPRSS2* eQTL variants associated with increased expression exhibited small effect  
325 sizes totaling <1% of variance explained. All other predictors were not significant.  
326 Collectively, these modeling results confirm that both T2 and interferon inflammation are  
327 strong and antagonistic regulators of *ACE2* expression and show that T2 inflammation  
328 is the lone dominant driver of airway expression of *TMPRSS2*.

329  
330 **Coronavirus Infections drive an enhanced cytotoxic immune response**

331  
332 Our metagenomic analysis of RNA-seq data from the nasal brushings identified 18  
333 children with viral sequence reads from one of four different coronavirus (CoV) species  
334 (OC43, JKU1, 229E, NL63) (Supplementary Table 5). This allowed us to explore airway  
335 transcriptomic responses to infection with coronavirus subfamily viruses specifically,  
336 which will likely most resemble responses to SARS-CoV-2. To increase the likelihood  
337 that these subjects were experiencing an active viral infection, we limited our analysis to  
338 the 11 most highly infected subjects, comparing them to all subjects not infected with a  
339 virus (n=571). To allow us to discriminate CoV-enhanced responses from those that are  
340 more general to respiratory viruses, we also established a virus control group composed  
341 of the 37 subjects highly infected with human rhinovirus species (HRV) (Supplementary  
342 Table 6). We first compared expression of genes in the cytotoxic immune response  
343 (purple) network and interferon response (tan) network (discussed earlier; see Figure  
344 4a, b) among these virus infected groups, and found that both networks were more  
345 highly expressed in virus-infected individuals (Figure 6a, b). Moreover, while the  
346 induction in interferon response was similar for both CoV and HRV groups, induction in  
347 the cytotoxic immune response was considerably higher in CoV-infected ( $\Delta E_g = 0.049$ )  
348 compared to HRV-infected individuals ( $\Delta E_g = 0.032$ , Figure 6b).  
349 To further explore this increase in cytotoxic immune response and other potential  
350 pathways in CoV-infected individuals, we next performed a transcriptome-wide screen  
351 for genes differentially expressed in CoV or HRV-infected groups compared to  
352 uninfected individuals. These analyses revealed 2,515 differentially expressed genes  
353 (DEGs) with CoV infection and 2,357 DEGs with HRV infection (FDR < 0.05 and  $\log_2FC$



354 > |0.5|), of which 35% and 31% were only observed with CoV and HRV infections,  
355 respectively, based on our significance cutoff (Figure 6c). Upstream regulator analysis  
356 with IPA carried out separately on CoV and HRV infection response genes showed that  
357 the top cytokines and transcription factors that may regulate these infections are shared  
358 between the two virus families, including IL10, IL1B, IFNG, IFNA2, and STAT1 (Figure  
359 6d). One inferred upstream regulator of CoV response genes, IL-6, which was also  
360 among the genes upregulated with CoV infection ( $\log_2FC=2.2$ , Figure 6e), is especially  
361 noteworthy considering that an IL-6 blocking antibody therapy is currently under  
362 investigation for use in treatment of COVID-19 illnesses<sup>24</sup>. Additionally, we found *ACE2*  
363 among the shared upregulated genes, reinforcing its upregulation in the course of  
364 different respiratory virus infections ( $\log_2FC$  in  $CoV^+=0.6$ ,  $\log_2FC$  in  $HRV^+=0.5$ , Figure  
365 6e).

366

367 In trying to understand the biological basis of the viral responses we found to be CoV-  
368 specific in our differential expression analysis, we considered whether the differential  
369 presence and/or response of various immune cell types was an explanatory factor. To  
370 investigate this, we used gene set enrichment analysis (GSEA) to test for enrichment of  
371 CoV-specific, HRV-specific, and CoV/HRV-shared DEG sets among gene markers for  
372 11 different flow-sorted human immune cell types defined based on whole transcriptome  
373 data (citation) (Supplementary Table 7). The shared viral DEGs showed significant  
374 enrichment for genes characteristic of macrophages, monocytes, neutrophils, dendritic  
375 cells, and NK cells. In contrast, the set of CoV-enhanced DEGs resulted in strong  
376 enrichments for both CD8+ T cells and dendritic cells, suggesting an especially

377 important role for activation of cytotoxic T cells through antigen presentation by dendritic  
378 cells in CoV infections (Figure 6f). Also supporting an enriched cytotoxic response  
379 among CoV-infected subjects was a strong enrichment for CoV-specific DEGs among  
380 NK cells, which participate heavily in the killing of virally infected cells (Figure 6g). We  
381 note that these enrichments were not observed among HRV-enhanced DEGs, which  
382 were instead most strongly enriched among neutrophils, as well as eosinophils,  
383 macrophages, and monocytes. Furthermore, through pathway analysis we identified  
384 multiple pathways related to cytotoxic T cell and NK cell activity that were enriched  
385 either specifically or more dramatically among CoV DEGs compared to HRV DEGs  
386 (Figure 6e). These results suggest that while CoV infections are highly similar to HRV  
387 infections, they likely elicit an enhanced cytotoxic immune response.

388

### 389 *Discussion*

390

391 Although the high variability in clinical outcomes of COVID-19 illness is now well  
392 documented and multiple demographic and clinical traits have been associated with  
393 severe disease, little is known about the host biologic factors underlying this variability.  
394 In the current study, we reasoned that population variation in upper airway expression  
395 of the ACE2 receptor for SARS-CoV-2 and the virus-activating TMPRSS2 protease,  
396 would drive infection susceptibility and disease severity. We therefore deployed network  
397 and eQTL analysis of nasal airway epithelial transcriptome data from a large cohort of  
398 healthy and asthmatic children to determine mechanisms associated with airway  
399 expression of these genes, and their relative power in explaining variation in the

400 expression of these genes among children. We observed only weak associations with  
401 asthma status, age, and gender among children aged 8-21 years. Moreover, although  
402 we found that genetics does influence expression of these genes, the effect of this  
403 variation was small in comparison to the dramatic influence of T2 cytokine-driven  
404 inflammation on both *ACE2* (downregulation) and *TMPRSS2* (upregulation) expression  
405 levels. We found an equally important role for viral-driven interferon inflammation in  
406 regulating levels of *ACE2* in the airway. Additionally, through study of *in vivo* upper  
407 airway CoV subfamily infections, we not only identify inflammatory regulators of these  
408 infections, but also provide evidence that this subfamily of viruses drives an enhanced  
409 cytotoxic immune response. Our work provides a set of biomarkers that can be easily  
410 examined in COVID-19 patients, through analysis of nasal swabs, to determine the  
411 relative importance of these mechanisms and genes in governing susceptibility to  
412 infection, severe illness and death.

413  
414 Our single cell analysis of an *in vivo* nasal brushing observed *ACE2* expression, albeit  
415 at low frequency, primarily among basal, ciliated, and less mature, early secretory cells.  
416 These results are supported by a recent report of *ACE2* expression in transient  
417 secretory cells, likely a close equivalent to our early secretory population<sup>25</sup>. Although a  
418 much higher portion of cells, representing all epithelial cell types, expressed *TMPRSS2*,  
419 the low frequency of *ACE2*<sup>+</sup> cells resulted in very few dual *ACE2/TMPRSS2* expressing  
420 cells. However, we caution that a cell may not need to be *TMPRSS2*<sup>+</sup> to be susceptible  
421 to infection, since it has been demonstrated the *TMPRSS2* protein is secreted from  
422 nasal airway epithelial cells<sup>26</sup>. We also caution that scRNA-seq data are known to

423 exhibit biases in gene detection, and thus the level and frequency of *ACE2* expression  
424 across cells may be much higher than we observe here. In line with this possibility we  
425 observe more moderate levels of *ACE2* expression in our bulk RNA-seq data on nasal  
426 brushings.

427  
428 Airway inflammation caused by type 2 cytokine production from infiltrating immune cells  
429 plays a prominent role in the control of cellular composition, expression, and thus  
430 biology of the airway epithelium<sup>11, 13, 23, 27</sup>. Moreover, while T2 airway inflammation is an  
431 important driver of T2-high asthma and COPD disease endotypes, it is also associated  
432 with atopy in the absence of lung disease, a very common phenotype in both children  
433 and adults. In fact, among the children in this study, we find that 43% of non-asthmatics  
434 were scored as T2-high based on expression profile, further substantiating the high  
435 prevalence of T2 airway inflammation outside of those with lung disease. Our data  
436 suggest that airway epithelial *TMPRSS2* expression is highly upregulated by T2  
437 inflammation, and specifically by IL-13. Both our network and single cell data show that  
438 *TMPRSS2* is most prominent in less developed “early secretory” cells as well as in more  
439 mature mucus secretory cells. Based on our *in vitro* data, IL-13 upregulates *TMPRSS2*  
440 across nearly all types of epithelial cells, but the core of this effect appears to be in the  
441 metaplastic mucus secretory cells that are generated as a consequence of IL-13  
442 signaling<sup>14, 15</sup>. In fact, our network data suggest that, although *TMPRSS2* expression is  
443 highly correlated with that of a co-expressed network of mucus secretory genes  
444 characterizing “normal”, non-metaplastic, mucus secretory cells, it’s correlated even  
445 more strongly with a network that characterizes mucus secretory cells undergoing IL-13-

446 induced metaplasia. In contrast to enhanced levels of *TMPRSS2*, T2 inflammation,  
447 whether observed *in vivo* or induced with IL-13 stimulation, precipitated a dramatic  
448 reduction in levels of epithelial *ACE2*, thus complicating expectations for how T2  
449 inflammation might affect overall risk for a poor COVID-19 outcome. Germane to this  
450 question, a recent study of 85 fatal COVID-19 subjects found that 81.2% of them  
451 exhibited very low levels of blood eosinophil levels<sup>4</sup>. Blood eosinophil levels are a  
452 strong, well-known predictor of airway T2 inflammation and were strongly correlated  
453 with T2 status in our study as well<sup>11, 23</sup>. Together, these studies provisionally suggest  
454 that T2 inflammation may predispose individuals to experience better COVID-19  
455 outcomes through a decrease in airway levels of *ACE2* that override any countervailing  
456 effect from increased expression of *TMPRSS2*. However, both *in vitro* experiments  
457 examining IL-13 effects on SARS-CoV-2 infection and empirical data on COVID-19  
458 outcomes among T2-high and T2-low patients will certainly be needed to determine  
459 whether this common airway inflammatory endotype ultimately protects against or  
460 exacerbates COVID-19 illness. As mentioned above, we note that measurement of  
461 blood eosinophil levels could be used as an informative and more accessible (albeit less  
462 powerful) proxy for investigating the association between airway T2 inflammation and  
463 outcomes of COVID-19. Moreover, given the higher frequency of T2 inflammation  
464 among asthmatic subjects, this population should be monitored especially closely given  
465 the enhanced risk of complications due to respiratory virus infection in those with  
466 asthma.  
467

468 In addition to a strong negative influence of T2 inflammation on *ACE2* expression in the  
469 airway, we found an equally strong positive influence of respiratory virus infections on  
470 levels of this gene. Network analysis placed *ACE2* within an interferon viral response  
471 network suggesting that these cytokines are a driving force behind *ACE2* upregulation.  
472 This information is interesting in several regards. First, it suggests that SARS-CoV-2  
473 and other coronaviruses using *ACE2* as a receptor could leverage the host anti-viral  
474 response to increase the infectability of airway cells. Secondly, as data here and  
475 elsewhere show, asymptomatic carriage of respiratory viruses is common, especially in  
476 young children<sup>19, 28-31</sup>. Children in the GALA II cohort included in this study ranged in  
477 age from 8-21 years; among them we found 18% who were carrying respiratory viruses  
478 without illness. However, as we show in this and our previous study<sup>19</sup>, even  
479 asymptomatic carriage of respiratory viruses exacts a fundamental change in airway  
480 epithelial expression and immune cell presence, including upregulation of *ACE2*  
481 expression. In determining outcomes, this potential detrimental influence of virus  
482 carriage may also be weighed against a potentially beneficial influence of virus carriage  
483 through a more potent cross serologic-immune defense in these individuals, especially if  
484 the virus carried is a coronavirus family member. Ultimately, the effect of current or  
485 recent virus carriage on COVID-19 outcomes will need to be determined by *in vivo*  
486 studies in patients, followed up with controlled *in vitro* studies of virally infected cells. At  
487 any rate, the apparent dependence of *ACE2* expression on interferon signaling  
488 suggests that targeted blockade of this interferon effect could control SARS-CoV-2  
489 infection.  
490

491 Our evaluation of genetic influences on airway *ACE2* and *TMPRSS2* expression  
492 revealed a single rare eQTL for *ACE2* and several more frequent eQTL variants for  
493 *TMPRSS2*. While both the effect size and explanatory power of these variants paled in  
494 comparison to the influence of T2 inflammation and interferon signaling in multi-variable  
495 modeling of expression for these genes, the effect of these variants may still be strong  
496 enough to alter infection rates and or illness severity, especially in the populations  
497 where these variants are most frequent. Thus, future genetic studies of COVID-19  
498 should pay particular attention to these eQTL variants.

499  
500 A particularly vexing question regards the mechanisms that underlie the unusual  
501 severity of illness associated with SARS-CoV-2, especially when compared to most  
502 circulating respiratory viruses. Clearly, severe disease often entails development of  
503 pneumonia, possibly resulting from an expanded tropism of SARS-CoV-2 to include  
504 lower lung airway and alveolar cells. The most severe patients also appear to  
505 experience an exuberant immune response, characterized a “cytokine storm”<sup>24</sup>,  
506 occurring with and possibly driving the development of acute respiratory distress  
507 syndrome (ARDS). Supposing that aspects of epithelial response to coronavirus family  
508 members would be shared, including with SARS-CoV-2, we examined *in vivo*  
509 coronavirus infection among the GALA II children. We found that CoV infections elicit a  
510 broad airway transcriptome response, similar to HRV infections, and we identified a  
511 panel of cytokines and transcription factors that likely regulate these responses. In  
512 particular, we found that IL-6 was predicted to regulate responses to CoV and was itself  
513 upregulated with these infections. These data support the recent investigation of

514 tocilizumab (IL-6R blocking antibody) for the treatment of COVID-19 illnesses<sup>24</sup>.  
515 Strikingly our analysis revealed an increased cytotoxic immune response with CoV  
516 infection, driven by the differential presence and activity of cytotoxic CD8+ T cells and  
517 NK cells, as compared to the more heavily neutrophil-based responses to HRV  
518 infection. Although preliminary, this finding, if similarly occurring with SARS-CoV-2  
519 infection, could partly explain the dramatic inflammation observed in SARS-CoV-2  
520 patients, which can extend to the distal lung.

521  
522 In summary, our data suggests that the strongest determinants of airway *ACE2* and  
523 *TMPRSS2* expression are T2 inflammation and viral-induced interferon inflammation,  
524 with limited but noteworthy influence from genetic variation. Whether these factors drive  
525 better or worse clinical outcomes remains to be determined, but closely watching  
526 individuals with these airway endotypes in the clinical management of COVID-19  
527 illnesses would be prudent.

528

529

530

531

532

533

534

535

536



537 *Methods*

538

539 MATERIALS AND CORRESPONDENCE

540 Further information and requests for resources and reagents should be directed to and

541 will be fulfilled by Max A. Seibold, Ph.D. ([seiboldm@njhealth.org](mailto:seiboldm@njhealth.org))

542

543 EXPERIMENTAL METHODS

544

545 **Human subject information**

546 Under the Institutional Review Board (IRB) approved Asthma Characterization Protocol

547 (ACP) at National Jewish Health (HS-3101) we consented a 56 year old asthmatic

548 subject, from which we collected nasal airway epithelial cells. The nasal airway cells

549 were brushed from the inferior turbinate using a cytology brush and used for the scRNA-

550 seq experiment described in Figure 1. Nasal airway epithelial cells used for bulk RNA-

551 seq network and eQTL analysis came from GALA II study subjects described below.

552 Nasal airway epithelial cell ALI culture experiments all used cells derived from GALA II

553 study subjects. Human tracheal airway epithelial cells used for *in vitro* IL13 stimulation

554 and scRNA-seq experiment were isolated from a single de-identified lung donor

555 obtained from the International Institute for the Advancement of Medicine (Edison, NJ),

556 and Donor Alliance of Colorado. The National Jewish Health Institutional Review Board

557 (IRB) approved our research on the tracheal airway epithelial cells under IRB protocol

558 HS-3209. These cells were processed and given to us through the National Jewish

559 Health (NJH) live cell core, which is an institutional review board-approved study (HS-  
560 2240) for the collection of tissues from consented patients for researchers at NJH.

561

## 562 **GALA II study subjects**

563 The Genes-Environment & Admixture in Latino Americans study (GALA II) is an on-  
564 going case-control study of asthma in Latino children and adolescents. GALA II was  
565 approved by local institutional review boards (UCSF, IRB number 10–00889, Reference  
566 number 153543, NJH HS-2627) and all subjects and legal guardians provided written  
567 informed assent and written informed consent, respectively<sup>32, 33</sup>. A full description of the  
568 study design and recruitment has been previously described elsewhere<sup>32-34</sup>. Briefly, the  
569 study includes subjects with asthma and healthy controls of Latino descent between the  
570 ages of 8 and 21, recruited from the community centers and clinics in the mainland U.S.  
571 and Puerto Rico (2006-present). Asthma case status was physician-diagnosed.  
572 Recruited subjects completed in-person questionnaires detailing medical,  
573 environmental, and demographic information. Physical measurements including  
574 spirometry were obtained, and subjects provided a blood sample for DNA extraction and  
575 later Whole Genome Sequencing. GALA subjects that were part of this analysis were all  
576 recruited from Puerto Rico (n=695). A nasal airway inferior turbinate brushing was used  
577 to collect airway epithelial cells from these subjects for whole transcriptome sequencing  
578 (n=695). Network analyses were performed on all subjects with nasal brushing whole  
579 transcriptome sequencing data (n=695) and eQTL analysis was performed on the  
580 subset (n=681) with whole genome sequencing generated genotype data.

581

582

### 583 **Bulk RNA sequencing of GALA II and ALI Samples**

584 Total RNA was isolated from GALA II subject nasal airway epithelial brushings using the  
585 AllPrep DNA/RNA Mini Kit (QIAGEN, Germantown, MD). Whole transcriptome libraries  
586 were constructed using the KAPA Stranded mRNA-seq library kit (Roche Sequencing  
587 and Life Science, Kapa Biosystems, Wilmington, MA) from 250ng of total input RNA  
588 with the Beckman Coulter Biomek FX<sup>P</sup> automation system (Beckman Coulter, Fullerton,  
589 CA) according to the manufacturers protocol. Barcoded libraries were pooled and  
590 sequenced using 125bp paired-end reads on the Illumina HiSeq 2500 system (Illumina,  
591 San Diego, CA). Bulk RNA-seq data for the nasal and tracheal ALI cultures to measure  
592 *ACE2* and *TMPRSS2* levels reported in Figures 3b,c and 4g,h, was generated with  
593 KAPA Hyperprep Stranded mRNA-seq library kits (Roche Sequencing and Life Science,  
594 Kapa Biosystems, Wilmington, MA) and sequenced with a Novaseq 6000 using 150bp  
595 paired end reads.

596

597

### 598 **Whole genome sequencing of GALA II Samples**

599 Genomic DNA was extracted from whole blood obtained from GALA II study subjects  
600 using the Wizard Genomic DNA Purification kits (Promega, Fitchburg, WI), and DNA  
601 was quantified by fluorescent assay. DNA samples were sequenced as part of the  
602 Trans-Omics for Precision Medicine (TOPMed) whole genome sequencing (WGS)  
603 program<sup>35</sup>. WGS was performed at the New York Genome Center and the Northwest  
604 Genomics Center on a HiSeqX system (Illumina, San Diego, CA) using a paired-end

605 read length of 150 base pairs, to a minimum of 30X mean genome coverage. Details on  
606 DNA sample handling, quality control, library construction, clustering and sequencing,  
607 read processing, and sequence data quality control are described elsewhere<sup>35</sup>. Variant  
608 calls were obtained from TOPMed data freeze 8 variant call format files.

609

610

### 611 **Experiments using an air-liquid interface, mucociliary culture system**

612 Primary human basal airway epithelial cells were expanded and differentiated at air-  
613 liquid interface (ALI) *in vitro* according to established protocols<sup>36</sup>. Paired tracheal ALI  
614 cultures were mock-treated or treated with 10 ng/mL IL-13 in media (20  $\mu$ L apical; 500  
615  $\mu$ L basolateral) for the final 10 days of differentiation (ALI days 11-21) before harvest  
616 and scRNA-seq analysis. In contrast, nasal ALI cultures used for bulk RNA-seq analysis  
617 (N = 5 GALA II subjects) were either stimulated with IL-13 for 72h following completion  
618 of mucociliary differentiation (25 days) or were infected with human rhinovirus strain  
619 A16 for 4 h during the final 24 h of the 28 days of differentiation. Control cultures were  
620 only treated with media.

621

### 622 **Preparation of ALI cultures for 10X scRNAseq**

623 Following stimulation experiments involving the tracheal airway epithelial ALI samples,  
624 apical culture chambers were washed once with PBS and once with PBS supplemented  
625 with dithiothreitol (DTT;10mM), followed by two PBS washes to remove residual DTT.  
626 Cold active protease (CAP) solution (*Bacillus licheniformis* protease 2.5  $\mu$ g/mL, DNase  
627 125 U/mL, and 0.5 mM EDTA in DPBS w/o  $Ca^{2+}Mg^{2+}$ ) was added to apical culture

628 chamber and incubated on ice for 10 minutes with mixing every 2.5 minutes.  
629 Dissociated cells in CAP solution were added to 500  $\mu$ L cold FBS, brought up to 5 mL  
630 with cold PBS, and centrifuged at 225 x g and 4°C for 5 minutes. The cell pellet was  
631 resuspended in 1 mL cold PBS+DTT, centrifuged at 225 x g and 4°C for 5 minutes, and  
632 then washed twice with cold PBS. The final cell pellet was resuspended in PBS with  
633 0.04% BSA for single cell gene expression profiling with the 10X Genomics system.  
634 Sample capture, cDNA synthesis, and library preparation for 10d IL-13 ALI stimulations  
635 was performed using protocols and reagents for 10X Genomics Chromium Single Cell  
636 3' v3 kit. Single cell libraries were pooled for sequencing on an Illumina NovaSeq 6000.  
637

#### 638 **Nasal brush 10X scRNA-seq**

639 Nasal brush cells were dissociated from the brush using *Bacillus licheniformis* cold  
640 active protease (10mg/ml), EDTA (0.5mM), and EGTA (0.5mM) at 4°C with vortex  
641 mixing, followed by enzyme neutralization with FBS. Red blood cell lysis was  
642 performed and cells were washed twice in 0.04% BSA/PBS. Cell concentration was  
643 adjusted to 400 cells/ $\mu$ L for cell capture of ~8000 cells using the 10X Genomics  
644 Chromium Next GEM Single Cell 3' reagent kit chemistry. Sample capture, cDNA  
645 synthesis, and library preparation was performed following 10X Genomics Chromium  
646 Next GEM Single Cell 3' v3 kit. The single cell library was sequenced on an Illumina  
647 NovaSeq 6000.

648

#### 649 **QUANTIFICATION AND STATISTICAL ANALYSIS**

650

## 651 **Nasal airway epithelium brushing bulk RNA-seq analysis**

652

### 653 *Preprocessing of RNA-seq data*

654 Raw sequencing reads were trimmed using skewer<sup>37</sup> (v0.2.2) with the following  
655 parameter settings: end-quality=15, mean-quality=25, min=30. Trimmed reads were  
656 then aligned to the human reference genome GRCh38 using GSNAP<sup>38</sup> (v20160501)  
657 with the following parameter settings: max-mismatches=0.05, indel-penalty=2, batch=3,  
658 expand-offsets=0, use-sarray=0, merge-distant-same-chr. Gene quantification was  
659 performed with htseq-count<sup>39</sup> (v0.9.1) using iGenomes GRCh38 gene transcript model.  
660 Variance stabilization transformation (VST) implemented in DESeq2<sup>40</sup> (v1.22.2) was  
661 then carried out on the raw gene count matrix to create a variance stabilized gene  
662 expression matrix suitable for downstream analyses.

663

### 664 *Weighted Gene Co-expression Network Analysis (WGCNA) on GALA II RNA-seq data*

665 To understand what biological mechanisms regulate the variation of nasal airway  
666 epithelial gene expression, Weighted Gene Co-expression Network Analysis<sup>41</sup>  
667 (WGCNA) v1.68 was performed on the VST matrix of 17,473 expressed genes.  
668 WGCNA analysis is a network-based approach that assumes a scale-free network  
669 topology. To adhere to the scale-free assumption of the constructed biological networks,  
670 a soft thresholding parameter ( $\beta$ ) value of 9 was chosen based on WGCNA guidelines.  
671 Furthermore, minClusterSize was set to 20, deepSplit was set to 2, and pamStage was  
672 set to TRUE. A total of 54 co-expression networks were identified and described in  
673 Supplementary Table 2. WGCNA networks are referred to by different colors, and two of

674 the these identified networks, saddle brown and tan were found to capture co-  
675 expressed genes that underlie T2 inflammation and interferon inflammation,  
676 respectively. We hierarchically clustered all subjects based on expression of genes in  
677 the saddle brown network and then used the first split in the dendrogram as the basis  
678 for assigning individuals to T2-high or T2-low categories (Supplementary Figure 1a).  
679 Similarly, we hierarchically clustered subjects using the genes in tan network and then  
680 selected the dendrogram branches with the highest tan network expression as  
681 interferon-high and the other subjects as interferon-low (Supplementary Figure 2a).

682

### 683 *Cis-eQTL analysis of nasal RNA-seq data*

684 Cis-expression quantitative trait locus (eQTL) analysis was performed by following the  
685 general methodology of the Genotype-Tissue Expression (GTEx) project version 7  
686 protocol<sup>42</sup>, using the nasal RNA-seq data and WGS variant data from 681 GALA II  
687 subjects.

688 Namely, WGS variant data was filtered based on allele frequency (minor allele  
689 frequency > 1%) and allele subject count (total number of subjects carrying minor allele  
690  $\geq 10$ ). After filtering, 12,590,800 genetic variants were carried forward into the eQTL  
691 analysis. For expression data filtering and preparation, we first ran Kallisto<sup>43</sup> (v0.43.0) to  
692 generate transcript per million (TPM) values. We filtered out any genes that did not  
693 reach both TPM > 0.1 and raw counts > 6 for at least 20% of our samples. After filtering,  
694 17,039 genes were then TMM normalized using edgeR<sup>44</sup> (v3.22.3). Finally, we applied  
695 an inverse normal transformation into the TMM-normalized expression values to render  
696 them suitable for eQTL analysis. To account for global population structure, we ran

697 ADMIXTURE<sup>45</sup> (v1.3.0) on the genotype data to create five admixture factors. We then  
698 ran Probabilistic Estimation of Expression Residuals<sup>46</sup> (PEER, v1.3) to create 60 PEER  
699 factors to utilize as covariates in the eQTL analysis along with admixture estimates,  
700 gender, age, body-mass index (BMI), and asthma diagnosis status. To perform cis-  
701 eQTL analysis, we utilized a modified version of FastQTL<sup>47</sup> that was provided by the  
702 GTEx project. Furthermore, we performed stepwise regression analysis to identify  
703 independent eQTL variants using QTLTools<sup>48</sup> (v1.1). Allelic Fold Change ( $A_{FC}$ ) of the  
704 eQTL variant is computed using the aFC python script<sup>49</sup>.

705

#### 706 *Virus identification and quantification from bulk RNA-Seq data*

707 To identify individuals with asymptomatic virus infection at the time of sample collection,  
708 viral genomic sequences were recovered from bulk RNA-seq data using a modified  
709 version of the Virus Finder 2.0 (VF2) pipeline<sup>50</sup>. A custom respiratory virus reference  
710 database comprising >600k sequences was employed to improve specificity. Using  
711 VF2, viral reads were garnered by removing human reads using Bowtie2<sup>51</sup> (default  
712 settings) and selecting viral reads using BLAT<sup>52</sup> (minIdentity=80); contigs were  
713 assembled using Trinity<sup>53</sup>; short (<200 bp) or low complexity (DUST score < 0.07)  
714 contigs and contigs matching the human genome at a BLAST<sup>54</sup> e-value <0.05 were  
715 discarded; the remaining contigs were classified using BLAST (e-value <0.05); read  
716 counts were obtained by read mapping using BLAT (minIdentity=98). Of the 468 distinct  
717 viral reference sequences detected by VF2, 7 were identified as erroneous and  
718 removed. The remaining 461 matches were manually assigned viral serotypes and the  
719 results aggregated with R.



720

721 *Defining CoV and HRV infected groups and associated analysis*

722 To ensure we selected subjects that were experiencing an active host response to a  
723 CoV infection, we examined the distribution of viral reads for the 18 CoV<sup>+</sup> infected  
724 subjects. We observed a clear break between the 7 subjects with the lowest viral read  
725 counts (<3,000 reads) and 11 subjects with the highest viral read counts (>60,000  
726 reads). Therefore, we selected these 11 highly infected subjects for analysis of host  
727 responses to CoV infection. To generate a similar infection-control group, composed of  
728 subjects highly infected with a different virus species, we examined the 67 HRV infected  
729 subjects in GALA, enforcing a comparable lower bound of viral reads as with CoV,  
730 adjusting for the smaller HRV genome size. Specifically, HRV genomes are ~7,000  
731 base pairs, whereas CoV genomes are ~30,000 base pairs, making the HRV genome  
732 ~25% of the size of the CoV genome. Therefore, we selected a cutoff of 15,000 viral  
733 reads for subjects to be included in the HRV<sup>+</sup> highly infected group. Therefore, we  
734 selected a cutoff of 15,000 viral reads for subjects to be included in the HRV<sup>+</sup> highly  
735 infected group (n=37) analyzed in Figure 6. All non-infected subjects (n=571), based on  
736 the Virus Finder analysis described above, were used as comparison group for the  
737 CoV<sup>+</sup> and HRV<sup>+</sup> groups.

738 In performing the CoV<sup>+</sup> and HRV<sup>+</sup> transcriptome-wide differential expression analyses,  
739 to account for the class imbalance of this experiment, log<sub>2</sub> count-normalized expression  
740 values in units of counts per million (calculated using edgeR v3.28.0) were passed to  
741 the function `arrayWeights` function in the `limma`<sup>55</sup> R package (3.42.0). `limma-voom` was  
742 then used to perform differential expression analysis on the count normalized

743 expression values between the CoV<sup>+</sup> and uninfected groups, as well as between the  
744 HRV<sup>+</sup> and uninfected groups, controlling for age, gender, and asthma diagnosis status.  
745 Genes were required to have an FDR adjusted p-value < 0.05, and an absolute log<sub>2</sub>FC  
746 > 0.5 to be considered significant. Based on these cutoffs, genes were classified as  
747 being shared if they were significant in both comparisons, or as CoV<sup>+</sup>-specific or HRV<sup>+</sup>-  
748 specific if significant in only one comparison.

749

750 *Gene set enrichment analysis.*

751 To investigate enriched pathways within WGCNA networks (see Figure 2a) or within  
752 genes differentially expressed in CoV<sup>+</sup> and/or HRV<sup>+</sup> infected subject groups (see Figure  
753 6c and 6c), we used Enrichr<sup>56</sup> to test for gene overrepresentation of network genes  
754 within a panel of annotated gene databases (Gene Ontology [GO] Biological Process  
755 [BP] 2018, GO Molecular Function [MF] 2018, GO Cellular Component [CC] 2018,  
756 Kyoto Encyclopedia of Genes and Genomes [KEGG] 2019 Human, and Reactome  
757 2016). For cell type enrichments within WGCNA networks reported in Figure 2a, we  
758 tested for overrepresentation of network genes within gene marker sets (FDR < 0.05)  
759 for each of 35 epithelial and immune cell types inferred using scRNA-seq of human lung  
760 tissue<sup>57</sup>.

761

762 For the plots in Figure 6f-g, transcriptomic data for 11 flow sorted immune cell  
763 populations were obtained from GEO experiments GSE3982 and GSE22886 and then  
764 batch corrected using the ComBat<sup>58</sup> function from the SVA R package (v3.34.0). limma  
765 was then used to perform differential expression analysis between each cell type and all

766 the rest in order to obtain gene  $\log_2$ FC values for each cell type with which to rank order  
767 the genes. Gene set enrichment analysis (GSEA) was then used to test for association  
768 between upregulated genes in the shared, CoV<sup>+</sup>-specific, and HRV<sup>+</sup>-specific gene sets  
769 and each of the cell types, based on the cell type-specific ordered gene lists. GSEA was  
770 carried out using the FGSEA R package (v1.12.0).

771

772

773 *Canonical pathway analysis.*

774 We used QIAGEN's Ingenuity Pathway Analysis (IPA) program (v01-16; content  
775 version: 51963813, release 2020-03-11) to investigate canonical pathways and  
776 upstream regulators that were significantly enriched in one or both of the upregulated  
777 CoV<sup>+</sup>-specific or HRV<sup>+</sup>-specific gene sets.

778

### 779 **Analysis of scRNA-seq data from the nasal epithelial brushing**

780 Initial processing of 10X scRNA-seq data, including cell demultiplexing, alignment to the  
781 human genome GRCh38, and UMI-based quantification was performed with Cell  
782 Ranger (version 3.0). Since the nasal brushing sample contains both epithelial and  
783 immune cell populations that have distinct expression profiles (e.g.: Immune cell types  
784 express far fewer genes compared to epithelial cell types), clustering and cell type  
785 identification were done in two stages: 1) an initial clustering with a less stringent filter to  
786 identify major epithelial and immune cell clusters was performed, 2) cells were  
787 reclustered with different independent filtering criteria for epithelial and immune cell  
788 types. All these analyses were performed using Seurat<sup>59</sup> R package (v3.0).

789  
790 In the first stage, we removed cells with fewer than 100 genes detected or cells with  
791 greater than 25% mitochondrial reads. Additionally, to remove possible doublets, we  
792 removed cells with higher than 6,000 genes detected and/or more than 20,000 UMIs.  
793 Lowly expressed genes (detected in fewer than 4 cells) were also removed. We then  
794 performed normalization using SCTransform<sup>60</sup> and ran PCA on the top 5000 highly  
795 variable normalized genes. Clustering analysis was performed on the top 20 PCs using  
796 a shared nearest neighbor (SNN) based SLM<sup>61</sup> algorithm with the following parameter  
797 settings: resolution=0.8, algorithm=3. The single cell expression profiles were visualized  
798 via embedding into two dimensions with UMAP<sup>62</sup> (Uniform Manifold Approximation and  
799 Projection), resulting in the identification of 11,157 epithelial cells and 229 immune cells  
800 based on known cell type signatures.

801  
802 In the second stage, we retained all the immune cells but removed epithelial cells with  
803 fewer than 1,000 detected genes. After this filtering, a combined 8,291 epithelial and  
804 immune cells were then normalized as in the first stage. Clustering analysis performed  
805 on the top 30 PCs with parameters (resolution=0.4, algorithm=1, k.param=10) identified  
806 15 clusters. We then ran differential expression analysis using a Wilcoxon test  
807 implemented in Seurat's "FindMarkers" function to help with cell type identification.  
808 Based on these cluster marker lists, two clusters were merged into a single secretory  
809 cluster, another two clusters were merged into a single ciliated cluster, and a final two  
810 clusters were combined as "indeterminate," based on the lack of defining marker genes  
811 for these clusters. Through this merging process, we arrived at 8 epithelial and 3

812 immune cell populations (Figure 1a, Supplementary Table 1)

813

814

815 **Analysis of bulk RNA-seq data from IL-13 and HRV infected ALI nasal airway**  
816 **epithelial cultures**

817 Raw sequencing reads were trimmed using skewer with the following parameter  
818 settings: end-quality=15, mean-quality=25, min=30. Trimmed reads were then aligned to  
819 the human reference genome GRCh38 using HISAT2<sup>63</sup> (v2.1.0) using default parameter  
820 settings. Gene quantification was performed with htseq-count using the GRCh38  
821 Ensembl v84 gene transcript model. After removing mitochondrial, ribosomal, and lowly  
822 expressed genes (those not expressed in at least two samples), we carried out  
823 differential expression analyses between paired IL-13-stimulated and control samples  
824 (N = 5 donors) and between paired HRV-infected and control samples (N = 5 donors)  
825 using the DESeq2 R package (v1.22.2).

826

827 **Analysis of scRNA-seq data from 10 day IL-13-stimulated and control tracheal cell**  
828 **ALI cultures**

829 As with the nasal brushing scRNA-seq data, 10X scRNA-seq data from ALI cultures  
830 grown from a single tracheal donor that were either mock- or IL-13 stimulated for 10  
831 days were pre-processed using Cell Ranger (version 3.0, 10X Genomics). To safeguard  
832 against doublets, we removed all cells with gene or UMI counts exceeding the 99th  
833 percentile. We also removed cells expressing fewer than 1,500 genes or for which >  
834 30% of genes were mitochondrial (genes beginning with *MTAT*, *MT-*, *MTCO*, *MTCY*,

835 *MTERF*, *MTND*, *MTRF*, *MTRN*, *MRPL*, or *MRPS*), resulting in a total of 6,969 cells  
836 (2,715 IL-13-stimulated and 4,254 controls). After removing mitochondrial, ribosomal  
837 (*RPL* and *RPS*), and very lowly expressed genes (expressed in < 0.1% of cells), we  
838 integrated expression data from IL-13 and control cells using the dataset integration  
839 approach in Seurat<sup>64</sup>. For the integration analysis, we used the top 30 dimensions from  
840 a canonical correlation analysis (CCA) based on SCTransform normalized expression of  
841 the top 3,000 most informative genes across the two datasets, where “informativeness”  
842 was defined by gene dispersion (i.e., the log of the ratio of expression variance to its  
843 mean) across cells, calculated after accounting for its relationship with mean  
844 expression. We then carried out principle component analysis (PCA) on the integrated  
845 dataset and used the top 20 components for clustering and visualization. We used SNN  
846 (Louvain algorithm, resolution=0.23, k.param=10) to cluster the integrated cells into 11  
847 populations, which we visualized in two dimensions using UMAP (see Figure 3d). These  
848 clusters were assigned cell type labels based their most upregulated genes, which were  
849 identified by carrying out differential expression analysis between each cluster and all  
850 others using Seurat’s logistic regression (LR) test, in which cell treatment was included  
851 as a latent variable.

852

#### 853 DATA AVAILABILITY

854 All raw and processed RNA-seq data used in this study are currently being deposited in  
855 the National Center for Biotechnology Information/Gene Expression Omnibus (GEO).

856

#### 857 CODE AVAILABILITY

858

859

860

861

862

863

864 *References*

865

866 1. Wang, C., Horby, P.W., Hayden, F.G. & Gao, G.F. A novel coronavirus outbreak  
867 of global health concern. *Lancet* **395**, 470-473 (2020).

868 2. Zhu, N. *et al.* A Novel Coronavirus from Patients with Pneumonia in China, 2019.  
869 *N Engl J Med* **382**, 727-733 (2020).

870 3. Baud, D. *et al.* Real estimates of mortality following COVID-19 infection. *Lancet*  
871 *Infect Dis* (2020).

872 4. Du, Y. *et al.* Clinical Features of 85 Fatal Cases of COVID-19 from Wuhan: A  
873 Retrospective Observational Study. *Am J Respir Crit Care Med* (2020).

874 5. Zhou, F. *et al.* Clinical course and risk factors for mortality of adult inpatients with  
875 COVID-19 in Wuhan, China: a retrospective cohort study. *Lancet* **395**, 1054-1062  
876 (2020).

877 6. Dong, Y. *et al.* Epidemiological Characteristics of 2143 Pediatric Patients With  
878 2019 Coronavirus Disease in China. *Pediatrics* (2020).

879 7. Hoffmann, M. *et al.* SARS-CoV-2 Cell Entry Depends on ACE2 and TMPRSS2  
880 and Is Blocked by a Clinically Proven Protease Inhibitor. *Cell* (2020).

- 881 8. Goldfarbmuren, K.C. *et al.* Dissecting the cellular specificity of smoking effects  
882 and reconstructing lineages in the human airway epithelium. *Nature*  
883 *Communications in press* (2020).
- 884 9. Montoro, D.T. *et al.* A revised airway epithelial hierarchy includes CFTR-  
885 expressing ionocytes. *Nature* **560**, 319-324 (2018).
- 886 10. Plasschaert, L.W. *et al.* A single-cell atlas of the airway epithelium reveals the  
887 CFTR-rich pulmonary ionocyte. *Nature* **560**, 377-381 (2018).
- 888 11. Woodruff, P.G. *et al.* T-helper Type 2-driven inflammation defines major  
889 subphenotypes of asthma. *American Journal of Respiratory and Critical Care*  
890 *Medicine* **180**, 388-395 (2009).
- 891 12. Barcelo, B. *et al.* Intracellular cytokine profile of T lymphocytes in patients with  
892 chronic obstructive pulmonary disease. *Clinical and Experimental Immunology*  
893 **145**, 474-479 (2006).
- 894 13. George, L. & Brightling, C.E. Eosinophilic airway inflammation: role in asthma  
895 and chronic obstructive pulmonary disease. *Therapeutic Advances in Chronic*  
896 *Disease* **7**, 34-51 (2016).
- 897 14. Chen, G. *et al.* SPDEF is required for mouse pulmonary goblet cell differentiation  
898 and regulates a network of genes associated with mucus production. *Journal of*  
899 *Clinical Investigation* **119**, 2914-2924 (2009).
- 900 15. Lachowicz-Scroggins, M.E. *et al.* Abnormalities in MUC5AC and MUC5B protein  
901 in airway mucus in asthma. *American Journal of Respiratory and Critical Care*  
902 *Medicine* **194**, 1296-1299 (2016).



- 903 16. de Lamballerie, C.N. *et al.* Characterization of cellular transcriptomic signatures  
904 induced by different respiratory viruses in human reconstituted airway epithelia.  
905 *Scientific Reports* **9** (2019).
- 906 17. Steuerman, Y. *et al.* Dissection of influenza infection *in vivo* by single-cell RNA  
907 sequencing. *Cell Systems*, 679-691 (2018).
- 908 18. Terrier, O. *et al.* Cellular transcriptional profiling in human lung epithelial cells  
909 infected by different subtypes of influenza A viruses reveals an overall down-  
910 regulation of the host p53 pathway. *Virology Journal* **8** (2011).
- 911 19. Wesolowska-Andersen, A. *et al.* Dual RNA-seq reveals viral infections in  
912 asthmatic children without respiratory illness which are associated with changes  
913 in the airway transcriptome. *Genome Biology* **18**, 1:17 (2017).
- 914 20. Aguet, F. *et al.* Genetic effects on gene expression across human tissues. *Nature*  
915 **550**, 204-217 (2017).
- 916 21. Everman, J.L. *et al.* Functional genomics of CDHR3 confirms its role in HRV-C  
917 infection and childhood asthma exacerbations. *Journal of Allergy and Clinical*  
918 *Immunology* **144**, 962-971 (2019).
- 919 22. Caliskan, M. *et al.* Rhinovirus wheezing illness and genetic risk of childhood-  
920 onset asthma. *New England Journal of Medicine* **368**, 1398-1407 (2013).
- 921 23. Poole, A. *et al.* Dissecting childhood asthma with nasal transcriptomics  
922 distinguishes subphenotypes of disease. *J Allergy Clin Immunol* **133**, 670-678  
923 e612 (2014).
- 924 24. Mehta, P. *et al.* COVID-19: consider cytokine storm syndromes and  
925 immunosuppression. *Lancet* **395**, 1033-1034 (2020).

- 926 25. Lukassen S, C.R., Elis R SARS-CoV-2 receptor ACE2 and TMPRSS2 are  
927 predominantly expressed in a transient secretory cell type in subsegmental  
928 bronchial branches. *bioRxiv* (2020).
- 929 26. Kesic, M.J., Meyer, M., Bauer, R. & Jaspers, I. Exposure to ozone modulates  
930 human airway protease/antiprotease balance contributing to increased influenza  
931 A infection. *PLoS One* **7**, e35108 (2012).
- 932 27. Peters, M.C. *et al.* A Transcriptomic Method to Determine Airway Immune  
933 Dysfunction in T2-High and T2-Low Asthma. *Am J Respir Crit Care Med* **199**,  
934 465-477 (2019).
- 935 28. Advani, S., Sengupta, A., Forman, M., Valsamakis, A. & Milstone, A.M. Detecting  
936 respiratory viruses in asymptomatic children. *Pediatr Infect Dis J* **31**, 1221-1226  
937 (2012).
- 938 29. Jartti, T., Jartti, L., Peltola, V., Waris, M. & Ruuskanen, O. Identification of  
939 respiratory viruses in asymptomatic subjects: asymptomatic respiratory viral  
940 infections. *Pediatr Infect Dis J* **27**, 1103-1107 (2008).
- 941 30. Singleton, R.J. *et al.* Viral respiratory infections in hospitalized and community  
942 control children in Alaska. *J Med Virol* **82**, 1282-1290 (2010).
- 943 31. Stelzer-Braid, S. *et al.* Absence of back to school peaks in human rhinovirus  
944 detections and respiratory symptoms in a cohort of children with asthma. *J Med*  
945 *Virol* **88**, 578-587 (2016).
- 946 32. Neophytou, A.M. *et al.* Air Pollution and Lung Function in Minority Youth with  
947 Asthma in the GALA II (Genes-Environments and Admixture in Latino

- 948 Americans) and SAGE II (Study of African Americans, Asthma, Genes, and  
949 Environments) Studies. *Am J Respir Crit Care Med* **193**, 1271-1280 (2016).
- 950 33. Nishimura, K.K. *et al.* Early-life air pollution and asthma risk in minority children.  
951 The GALA II and SAGE II studies. *Am J Respir Crit Care Med* **188**, 309-318  
952 (2013).
- 953 34. Thakur, N. *et al.* Socioeconomic status and childhood asthma in urban minority  
954 youths. The GALA II and SAGE II studies. *Am J Respir Crit Care Med* **188**, 1202-  
955 1209 (2013).
- 956 35. Taliun, D. *et al.* Sequencing of 53,831 diverse genomes from the NHLBI  
957 TOPMed Program. *bioRxiv* (2019).
- 958 36. Everman, J.L., Rios, C. & Seibold, M.A. Utilization of Air-Liquid Interface Cultures  
959 as an In Vitro Model to Assess Primary Airway Epithelial Cell Responses to the  
960 Type 2 Cytokine Interleukin-13. *Methods Mol Biol* **1799**, 419-432 (2018).
- 961 37. Jiang, H., Lei, R., Ding, S.W. & Zhu, S. Skewer: a fast and accurate adapter  
962 trimmer for next-generation sequencing paired-end reads. *BMC Bioinformatics*  
963 **15**, 182 (2014).
- 964 38. Wu, T.D. & Nacu, S. Fast and SNP-tolerant detection of complex variants and  
965 splicing in short reads. *Bioinformatics* **26**, 873-881 (2010).
- 966 39. Anders, S., Pyl, P.T. & Huber, W. HTSeq--a Python framework to work with high-  
967 throughput sequencing data. *Bioinformatics* **31**, 166-169 (2015).
- 968 40. Love, M.I., Huber, W. & Anders, S. Moderated estimation of fold change and  
969 dispersion for RNA-seq data with DESeq2. *Genome Biol* **15**, 550 (2014).

- 970 41. Langfelder, P. & Horvath, S. WGCNA: an R package for weighted correlation  
971 network analysis. *BMC Bioinformatics* **9**, 559 (2008).
- 972 42. Consortium, G.T. *et al.* Genetic effects on gene expression across human  
973 tissues. *Nature* **550**, 204-213 (2017).
- 974 43. Bray, N.L., Pimentel, H., Melsted, P. & Pachter, L. Near-optimal probabilistic  
975 RNA-seq quantification. *Nat Biotechnol* **34**, 525-527 (2016).
- 976 44. Robinson, M.D., McCarthy, D.J. & Smyth, G.K. edgeR: a Bioconductor package  
977 for differential expression analysis of digital gene expression data. *Bioinformatics*  
978 **26**, 139-140 (2010).
- 979 45. Alexander, D.H. & Lange, K. Enhancements to the ADMIXTURE algorithm for  
980 individual ancestry estimation. *BMC Bioinformatics* **12**, 246 (2011).
- 981 46. Stegle, O., Parts, L., Durbin, R. & Winn, J. A Bayesian framework to account for  
982 complex non-genetic factors in gene expression levels greatly increases power in  
983 eQTL studies. *PLoS Comput Biol* **6**, e1000770 (2010).
- 984 47. Ongen, H., Buil, A., Brown, A.A., Dermitzakis, E.T. & Delaneau, O. Fast and  
985 efficient QTL mapper for thousands of molecular phenotypes. *Bioinformatics* **32**,  
986 1479-1485 (2016).
- 987 48. Delaneau, O. *et al.* A complete tool set for molecular QTL discovery and  
988 analysis. *Nat Commun* **8**, 15452 (2017).
- 989 49. Mohammadi, P., Castel, S.E., Brown, A.A. & Lappalainen, T. Quantifying the  
990 regulatory effect size of cis-acting genetic variation using allelic fold change.  
991 *Genome Res* **27**, 1872-1884 (2017).

- 992 50. Wang, Q., Jia, P. & Zhao, Z. VERSE: a novel approach to detect virus integration  
993 in host genomes through reference genome customization. *Genome Med* **7**, 2  
994 (2015).
- 995 51. Langmead, B. & Salzberg, S.L. Fast gapped-read alignment with Bowtie 2. *Nat*  
996 *Methods* **9**, 357-359 (2012).
- 997 52. Kent, W.J. BLAT--the BLAST-like alignment tool. *Genome Res* **12**, 656-664  
998 (2002).
- 999 53. Grabherr, M.G. *et al.* Full-length transcriptome assembly from RNA-Seq data  
1000 without a reference genome. *Nat Biotechnol* **29**, 644-652 (2011).
- 1001 54. Altschul, S.F., Gish, W., Miller, W., Myers, E.W. & Lipman, D.J. Basic local  
1002 alignment search tool. *J Mol Biol* **215**, 403-410 (1990).
- 1003 55. Ritchie, M.E. *et al.* limma powers differential expression analyses for RNA-  
1004 sequencing and microarray studies. *Nucleic Acids Res* **43**, e47 (2015).
- 1005 56. Chen, E.Y. *et al.* Enrichr: interactive and collaborative HTML5 gene list  
1006 enrichment analysis tool. *BMC Bioinformatics* **14**, 128 (2013).
- 1007 57. Travaglini, K.J. *et al.* A molecular cell atlas of the human lung from single cell  
1008 RNA sequencing. *bioRxiv* (2020).
- 1009 58. Johnson, W.E., Li, C. & Rabinovic, A. Adjusting batch effects in microarray  
1010 expression data using empirical Bayes methods. *Biostatistics* **8**, 118-127 (2007).
- 1011 59. Butler, A., Hoffman, P., Smibert, P., Papalexi, E. & Satija, R. Integrating single-  
1012 cell transcriptomic data across different conditions, technologies, and species.  
1013 *Nat Biotechnol* **36**, 411-420 (2018).

- 1014 60. Hafemeister, C. & Satija, R. Normalization and variance stabilization of single-cell  
1015 RNA-seq data using regularized negative binomial regression. *Genome Biol* **20**,  
1016 296 (2019).
- 1017 61. Waltman, L. & Van Eck, N.J. A smart local moving algorithm for large-scale  
1018 modularity-based community detection. *European Physical Journal B* **86**, 471  
1019 (2013).
- 1020 62. McInnes, L. & Healy, J. Uniform Manifold Approximation and Projection for  
1021 Dimension Reduction. *ArXiv* (2018).
- 1022 63. Kim, D., Langmead, B. & Salzberg, S.L. HISAT: a fast spliced aligner with low  
1023 memory requirements. *Nat Methods* **12**, 357-360 (2015).
- 1024 64. Stuart, T. *et al.* Comprehensive integration of single-cell data. *Cell* **177**, 1888-  
1025 1902 (2019).

1026

1027

1028

1029

1030

1031

1032

1033 *Acknowledgements*

1034

1035 This work was supported by NIH grants (MAS) U01 HL138626, R01 HL135156, R01  
1036 MD010443, R01 HL128439, P01 HL132821, P01 HL107202, R01 HL117004, and DOD  
1037 Grant W81WH-16-2-0018.

1038 The Genes-Environments and Admixture in Latino Americans (GALA II) Study and  
1039 E.G.B. were supported by the Sandler Family Foundation, the American Asthma  
1040 Foundation, the RWJF Amos Medical Faculty Development Program, the Harry Wm.  
1041 and Diana V. Hind Distinguished Professor in Pharmaceutical Sciences II, the National  
1042 Heart, Lung, and Blood Institute (NHLBI) [R01HL117004, R01HL128439,  
1043 R01HL135156, X01HL134589]; the National Institute of Environmental Health Sciences  
1044 [R01ES015794]; the National Institute on Minority Health and Health Disparities  
1045 (NIMHD) [P60MD006902, R01MD010443], the National Human Genome Research  
1046 Institute [U01HG009080] and the Tobacco-Related Disease Research Program [24RT-  
1047 0025, 27IR-0030]. MJW was supported by the NHLBI [K01HL140218]. Burchard NIH  
1048 Support: T32 GM007546, U01 HL138626, R01 128439, R01 HL141992, R01  
1049 HL141845.

1050 Whole genome sequencing (WGS) for the Trans-Omics in Precision Medicine  
1051 (TOPMed) program was supported by the National Heart, Lung and Blood Institute  
1052 (NHLBI). WGS for "NHLBI TOPMed: Gene-Environment, Admixture and Latino  
1053 Asthmatics Study" (phs000920) was performed at the New York Genome Center  
1054 (3R01HL117004-02S3) and the University of Washington Northwest Genomics Center  
1055 (HHSN268201600032I). Centralized read mapping and genotype calling, along with  
1056 variant quality metrics and filtering were provided by the TOPMed Informatics Research  
1057 Center (3R01HL-117626-02S1; contract HHSN268201800002I). Phenotype

1058 harmonization, data management, sample-identity QC, and general study coordination  
1059 were provided by the TOPMed Data Coordinating Center (3R01HL-120393-02S1,  
1060 U01HL-120393, contract HHSN268201800001I). We gratefully acknowledge the studies  
1061 and participants who provided biological samples and data for TOPMed.

1062 WGS of part of GALA II was performed by New York Genome Center under The  
1063 Centers for Common Disease Genomics of the Genome Sequencing Program (GSP)  
1064 Grant (UM1 HG008901). The GSP Coordinating Center (U24 HG008956) contributed to  
1065 cross-program scientific initiatives and provided logistical and general study  
1066 coordination. GSP is funded by the National Human Genome Research Institute, the  
1067 National Heart, Lung, and Blood Institute, and the National Eye Institute.

1068 The authors wish to acknowledge the following GALA II study collaborators: Shannon  
1069 Thyne, UCSF; Harold J. Farber, Texas Children's Hospital; Denise Serebrisky, Jacobi  
1070 Medical Center; Rajesh Kumar, Lurie Children's Hospital of Chicago; Emerita Brigino-  
1071 Buenaventura, Kaiser Permanente; Michael A. LeNoir, Bay Area Pediatrics; Kelley  
1072 Meade, UCSF Benioff Children's Hospital, Oakland; William Rodríguez-Cintrón, VA  
1073 Hospital, Puerto Rico; Pedro C. Ávila, Northwestern University; Jose R. Rodríguez-  
1074 Santana, Centro de Neumología Pediátrica; Luisa N. Borrell, City University of New  
1075 York; Adam Davis, UCSF Benioff Children's Hospital, Oakland; Saunak Sen, University  
1076 of Tennessee.

1077 The authors acknowledge the families and patients for their participation and thank the  
1078 numerous health care providers and community clinics for their support and  
1079 participation in GALA II. In particular, the authors thank the recruiters who obtained the



1080 data: Duanny Alva, MD; Gaby Ayala-Rodríguez; Lisa Caine, RT; Elizabeth Castellanos;  
1081 Jaime Colón; Denise DeJesus; Blanca López; Brenda López, MD; Louis Martos; Vivian  
1082 Medina; Juana Olivo; Mario Peralta; Esther Pomares, MD; Jihan Quraishi; Johanna  
1083 Rodríguez; Shahdad Saeedi; Dean Soto; and Ana Taveras.

1084 The content is solely the responsibility of the authors and does not necessarily  
1085 represent the official views of the National Institutes of Health.

1086  
1087

1088

1089

1090

1091

1092

1093

1094

1095

1096

1097

1098

1099

1100

1101

1102

1103

1104

1105

1106

1107

1108

1109

1110

1111 *Figure Legends*

1112

1113 **Figure 1. *ACE2* and *TMPRSS2* are expressed by multiple nasal airway epithelial**  
1114 **cell types**

1115 (a) UMAP visualization of cells derived from a human nasal airway epithelial brushing  
1116 depicts multiple epithelial and immune cell types identified through unsupervised  
1117 clustering.

1118 (b) Normalized expression of *ACE2* in epithelial and immune cell types.

1119 (c) Normalized expression of *TMPRSS2* in epithelial and immune cell types.

1120

1121 **Figure 2. *TMPRSS2* is a mucus secretory network gene regulated by T2**  
1122 **inflammation**

1123 (a) WGCNA identified networks of co-regulated genes related to mucus secretory  
1124 function (black), T2 inflammation-induced mucus secretory function (pink), and

1125 canonical T2 inflammation biomarkers (saddle brown). *TMPRSS2* was within the pink  
1126 network. Select pathway and cell type enrichments for network genes are shown.

1127 (b) Scatterplot revealing a strong positive correlation between *TMPRSS2* expression  
1128 and summary (eigengene) expression of the T2 inflammatory, mucus secretory network.

1129 (c) Scatterplot revealing a strong positive correlation between *TMPRSS2* expression  
1130 and summary (eigengene) expression of the canonical T2 inflammation biomarker  
1131 network.

1132 (d) Box plots revealing strong upregulation of *TMPRSS2* expression among T2-high  
1133 compared to T2-low subjects.

1134 (e) Scatterplot revealing a strong negative correlation between *ACE2* expression and  
1135 summary (eigengene) expression of the T2 inflammation mucus secretory network.

1136 (f) Scatterplot revealing a strong negative correlation between *ACE2* expression and  
1137 summary (eigengene) expression of the canonical T2 inflammation biomarker network.

1138 (g) Box plots revealing strong downregulation of *ACE2* expression among T2-high  
1139 compared to T2-low subjects.

1140

1141 **Figure 3. *ACE2* and *TMPRSS2* expression are both regulated by IL-13 in the**  
1142 **mucociliary airway epithelium**

1143 (a) Experimental schematic detailing the timeline for differentiation of basal airway  
1144 epithelial cells into a mucociliary airway epithelium and treatment with chronic (10 days)  
1145 or acute (72 hours) IL-13 (10ng/ml).

1146 (b) Box plots of count-normalized expression between paired nasal airway cultures  
1147 (control/IL-13) revealing strong downregulation of bulk *ACE2* expression with IL-13  
1148 treatment. Differential expression results are from DESeq2.

1149 (c) Box plots of count-normalized expression between paired nasal airway cultures  
1150 (control/IL-13) revealing strong upregulation of bulk *TMPRSS2* expression with IL-13  
1151 treatment. Differential expression results are from DESeq2.

1152 (d) UMAP visualization of cells derived from control and IL-13 stimulated tracheal airway  
1153 ALI cultures depict multiple epithelial cell types identified through unsupervised  
1154 clustering.

1155 (e) Violin plots of normalized *ACE2* expression across epithelial cell types from tracheal  
1156 airway ALI cultures, stratified by treatment (gray = control, red = IL-13). Differential  
1157 expression using a Wilcoxon test was performed between control and IL-13-stimulated  
1158 cells with significant differences in expression for a cell type indicated by a \* ( $p < 0.05$ ).

1159 (f) Violin plots of normalized *TMPRSS2* expression across epithelial cell types from  
1160 tracheal airway ALI cultures, stratified by treatment (gray = control, red = IL-13).  
1161 Differential expression using a Wilcoxon test was performed between control and IL-13-  
1162 stimulated cells with significant differences in expression for a cell type indicated by a \*  
1163 ( $p < 0.05$ ).

1164

1165 **Figure 4. *ACE2* is an interferon response network gene regulated by respiratory**  
1166 **virus infections**

1167 (a) Scatter plot revealing a strong positive correlation between *ACE2* expression and  
1168 summary (eigengene) expression of the cytotoxic immune response network (purple).

1169 (b) Scatterplot revealing a strong positive correlation between *ACE2* expression and  
1170 summary (eigengene) expression of the interferon response network (tan).

1171 (c) WGCNA analysis identified networks of co-regulated genes related to cytotoxic  
1172 immune response (purple) and interferon response (tan). *ACE2* was within the purple  
1173 network. Select pathway and cell type enrichments for network genes are shown.

1174 (d) Box plots of count-normalized expression from GALA II nasal epithelial samples  
1175 reveal strong upregulation of *ACE2* expression among interferon-high compared to  
1176 interferon-low subjects. Differential expression results are from DESeq2.

1177 (e) Pie graph depicting the percentage of each type of respiratory virus infection found  
1178 among GALA II subjects in whom viral reads were found.

1179 (f) Experimental schematic detailing timeline for differentiation of basal airway epithelial  
1180 cells into a mucociliary airway epithelium and experimental infection with HRV-A16.

1181 (g) Box plots of count-normalized expression between paired nasal airway cultures  
1182 (control/HRV-A16 infected) revealing strong upregulation of *ACE2* expression with  
1183 HRV-A16 infection. Differential expression results are from DESeq2.

1184 (h) Box plots of count-normalized expression between paired nasal airway cultures  
1185 (control/HRV-A16-infected) revealing no effect of HRVA-16 on *TMPRSS2* expression.  
1186 Differential expression results are from DESeq2.

1187

1188 **Figure 5. *ACE2* and *TMPRSS2* nasal airway expression are regulated by eQTL**  
1189 **variants**

1190 (a) Locuszoom plot of *ACE2* eQTL signals. The lead eQTL variant (rs18160331) is  
1191 highlighted with a purple dot. The strength of Linkage Disequilibrium (LD) between

1192 rs18160331 and other variants is discretely divided into five quantiles and mapped into  
1193 five colors (dark blue, sky blue, green, orange, and red) sequentially from low LD to high  
1194 LD.

1195 (b) Locuszoom plot of *TMPRSS2* eQTL signals. The three independent eQTL variants  
1196 (rs1475908, rs2838057, rs74659079) and their LD with other variants ( $r^2$ ) are  
1197 represented by red, blue, and green color gradient respectively.

1198 (c) Box plots of normalized *ACE2* expression among the three genotypes of the lead  
1199 *ACE2* eQTL variant (rs18160331).  $\log_2 A_{FC}$  = log2 of the allelic fold change associated  
1200 with the variant.

1201 (d) Box plots of normalized *TMPRSS2* expression among the three genotypes of the  
1202 lead *TMPRSS2* eQTL variant (rs1475908).  $\log_2 A_{FC}$  = log2 of the allelic fold change  
1203 associated with the variant.

1204 (e) Bar plots depicting allele frequencies of the *ACE2* eQTL variant rs18160331 and  
1205 *TMPRSS2* eQTL variants (rs1475908, rs2838057, rs74659079) across world  
1206 populations. Allele frequency data were obtained from gnomAD v2.1.1.

1207

1208 **Figure 6. Coronavirus infections elicit an enhanced cytotoxic immune response**  
1209 **from the airway epithelium**

1210 (a) Box plots revealing a strong and equivalent upregulation of summary (eigengene  
1211 [ $E_g$ ]) expression for the interferon response network among HRV and CoV-infected  
1212 GALA II subjects, compared to uninfected subjects.

1213 (b) Box plots revealing upregulation in summary (eigengene) expression for the  
1214 cytotoxic immune response network among HRV-infected GALA II subjects that is even  
1215 stronger for the CoV infected group.

1216 (c) Venn Diagram describing the number of differentially expressed genes in HRV and  
1217 CoV infected groups compared to the uninfected group, and the extent of their overlap.  
1218 For genes differentially expressed in both groups, select enriched pathways and  
1219 underlying genes that are highly differentially expressed are shown.

1220 (d) Top upstream regulators predicted by Ingenuity Pathway Analysis to be regulating  
1221 the genes that were upregulated in CoV. Enrichment values for these CoV regulators,  
1222 using the HRV upregulated genes are also shown.

1223 (e) Heatmap of the  $\log_2FC$  in gene expression for CoV and HRV groups when  
1224 compared to the uninfected group. Top significantly upregulated genes are shown,  
1225 along with *ACE2*, *IL6*, and genes identified as belonging to cytotoxic pathways, which  
1226 were enriched within the virally upregulated CoV group DEGs based on IPA canonical  
1227 pathway analysis. Color bars indicate which WGCNA network and or IPA canonical  
1228 pathway each gene belongs to.

1229 (f) Gene set enrichment analysis plot for CD8+ T cells. The black (shared), yellow (CoV-  
1230 enhanced), and red (HRV-enhanced) curves display the enrichment score for the  
1231 indicated viral gene set as the analysis walks down the ranked distribution of genes  
1232 ordered by fold change in expression between CD8+ T cells relative to all other immune  
1233 cell types (red-blue color bar). Genes are represented by vertical bars in the same color  
1234 as the curve of the viral gene group they represent. Denoted genes are a representative  
1235 set from the leading edge (most responsible for the enrichment).

1236 (g) Gene set enrichment analysis plot for NK cells. The black (shared), yellow (CoV-  
1237 enhanced), and red (HRV-enhanced) curves display the enrichment score for the  
1238 indicated viral gene set as the analysis walks down the ranked distribution of genes  
1239 ordered by fold change in expression between NK cells relative to all other immune cell  
1240 types (red-blue color bar). Genes are represented by vertical bars in the same color as  
1241 the curve of the viral gene group they represent. Denoted genes are from the leading  
1242 edge (most responsible for the enrichment).

1243

1244

1245



**a**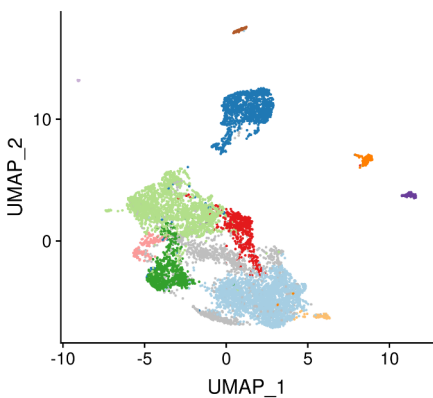

- Indeterminate
- Basal/early sec.
- Ciliated
- Secretory
- Mucus sec.
- MUC5AC mucus sec.
- Glandular mucus sec.
- Prolif. Basal
- Mast cells
- DCs
- T cells
- Ionocytes

**b****ACE2**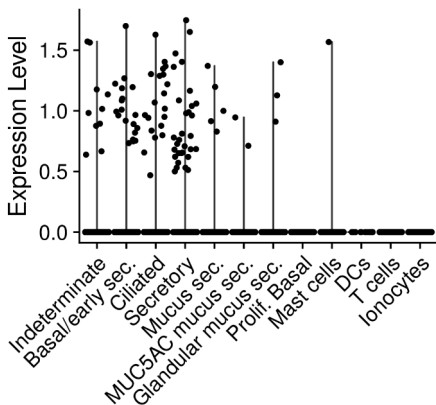**c****TMPRSS2**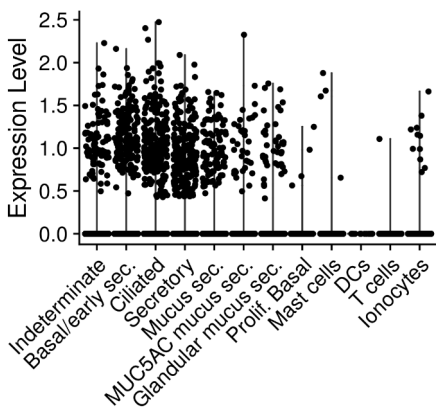

**a**

| Network (color)                       | Network size (# genes) | Select genes                              | Pathway enrichment                                                               | Cell-type enrichment                                 |
|---------------------------------------|------------------------|-------------------------------------------|----------------------------------------------------------------------------------|------------------------------------------------------|
| Mucus secretory (black)               | 477                    | COPA<br>COPB2<br>COPG1<br>CREB3L1<br>XBP1 | Golgi vesicle transport<br>( <i>p</i> -adj: 2e-6)                                | Goblet<br>( <i>p</i> -adj: 2e-17)                    |
|                                       |                        |                                           | COPI-mediated anterograde transport<br>( <i>p</i> -adj: 9e-6)                    | Diff. basal<br>( <i>p</i> -adj: 0.03)                |
| T2 mucus secretory (pink)             | 446                    | SPDEF<br>FCGBP<br>FOXA3<br>IL13<br>BPIFB1 | O-glycan processing<br>( <i>p</i> -adj: 9e-4)                                    | Goblet<br>( <i>p</i> -adj: 2e-6)                     |
|                                       |                        |                                           | Polypeptide N-acetylgalactosaminyltransferase activity<br>( <i>p</i> -adj: 3e-3) | Serous<br>( <i>p</i> -adj: 3e-3)                     |
| Canonical T2 biomarker (saddle brown) | 156                    | CLCA1<br>CCL26<br>POSTN<br>IL1RL1<br>CPA3 | Interleukin-13 human airway epithelial cells<br>( <i>p</i> -adj: 9e-29)          | Mast cell/basophil type 1<br>( <i>p</i> -adj: 6e-11) |
|                                       |                        |                                           | Interleukin-4 human keratinocyte<br>( <i>p</i> -adj: 0.02)                       | Mast cell/basophil type 2<br>( <i>p</i> -adj: 6e-11) |

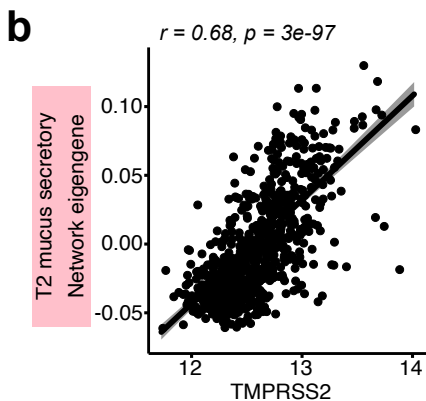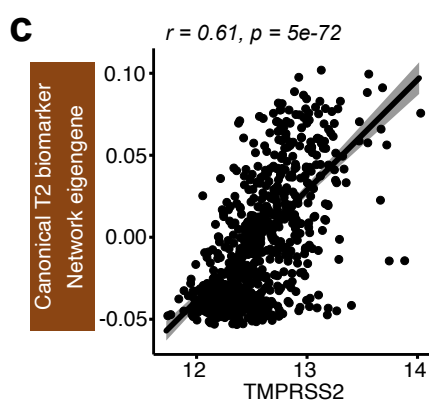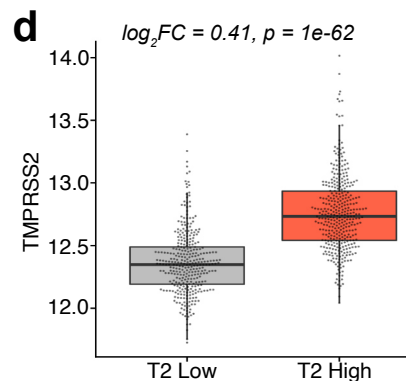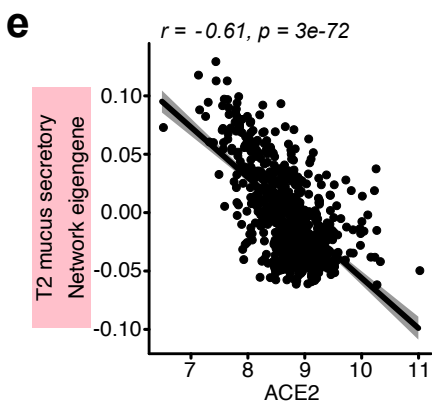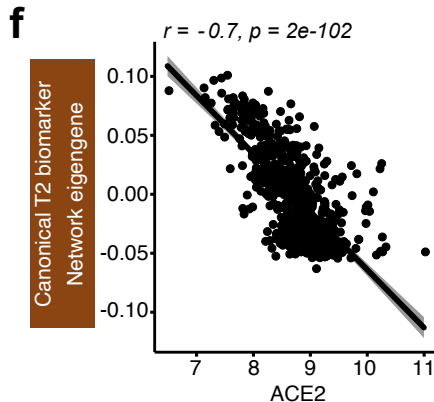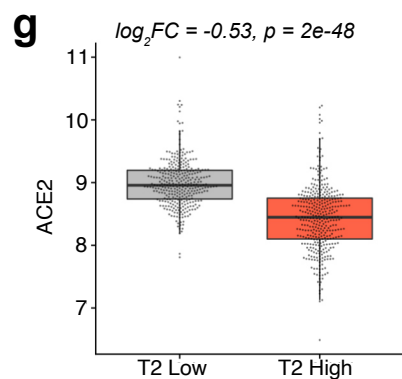

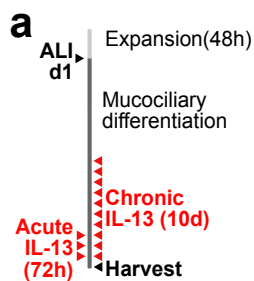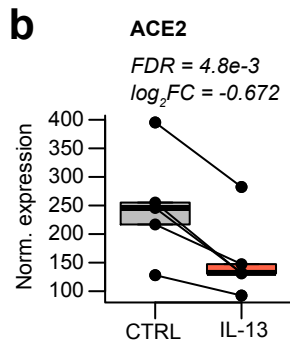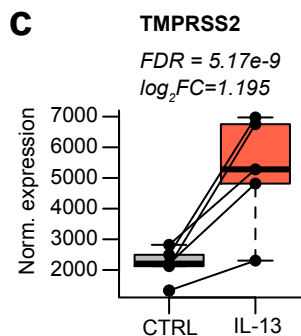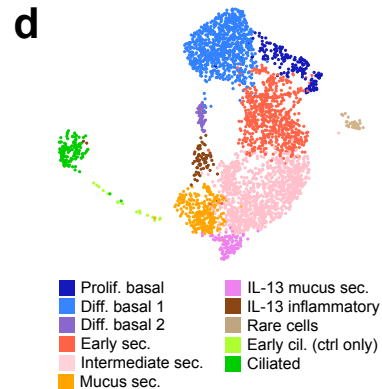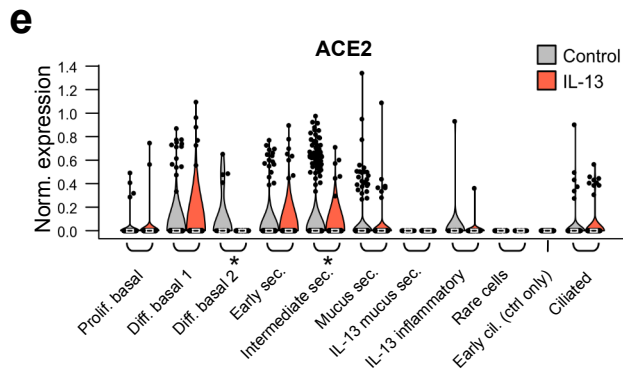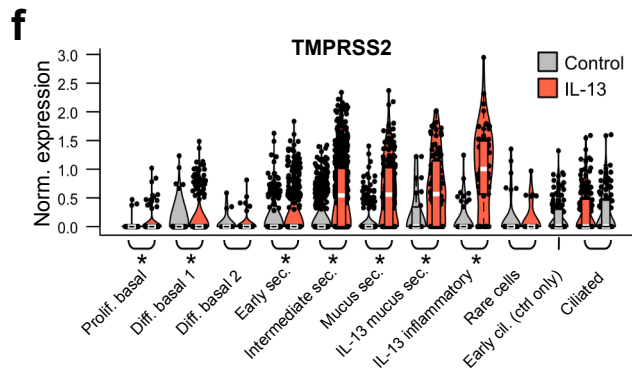

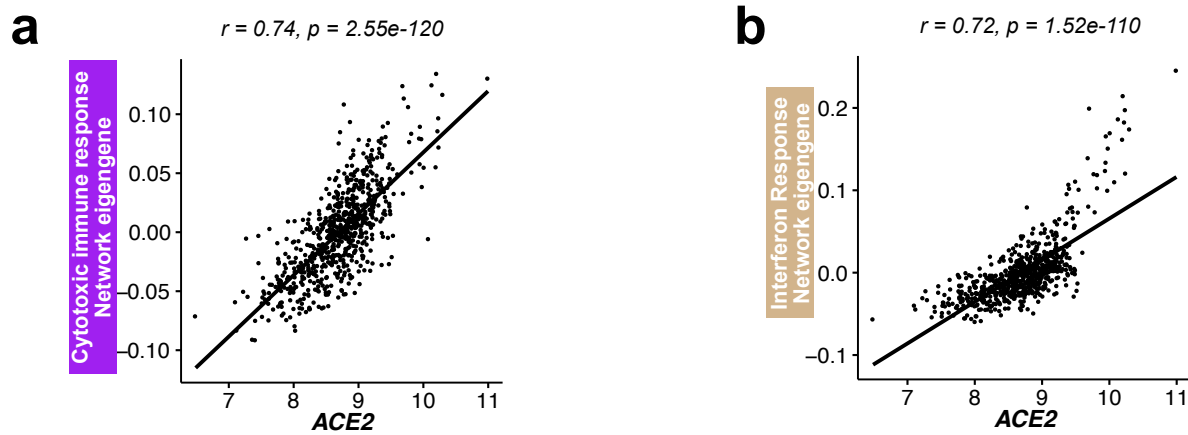

**c**

| Network (color)                    | Network size (# genes) | Hub genes                              | Pathway enrichment                                                                                   | Cell-type enrichment                         |
|------------------------------------|------------------------|----------------------------------------|------------------------------------------------------------------------------------------------------|----------------------------------------------|
| Cytotoxic immune response (purple) | 417                    | IKZF3<br>CD3E<br>CXCR3<br>CCR5<br>NKG7 | T cell receptor signaling pathway<br>( <i>p</i> -adj: $6e-16$ )                                      | CD8 effector T<br>( <i>p</i> -adj: $5e-45$ ) |
|                                    |                        |                                        | Antigen processing and presentation of peptide antigen via MHC class II<br>( <i>p</i> -adj: $1e-7$ ) | Dendritic cell<br>( <i>p</i> -adj: $5e-22$ ) |
| Interferon response (tan)          | 296                    | IFIT2<br>IFIT3<br>OAS2<br>MX1<br>IRF1  | Type I interferon signaling pathway<br>( <i>p</i> -adj: $1e-34$ )                                    | Monocyte<br>( <i>p</i> -adj: $6e-10$ )       |
|                                    |                        |                                        | AIM2 inflammasome complex<br>( <i>p</i> -adj: $0.05$ )                                               | Macrophage<br>( <i>p</i> -adj: $1e-8$ )      |

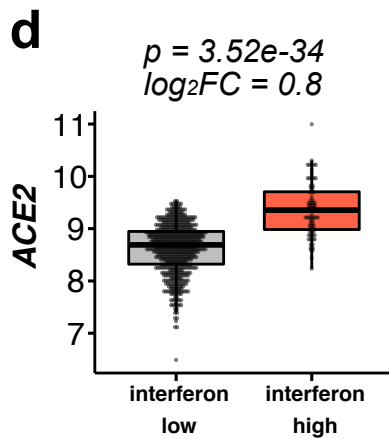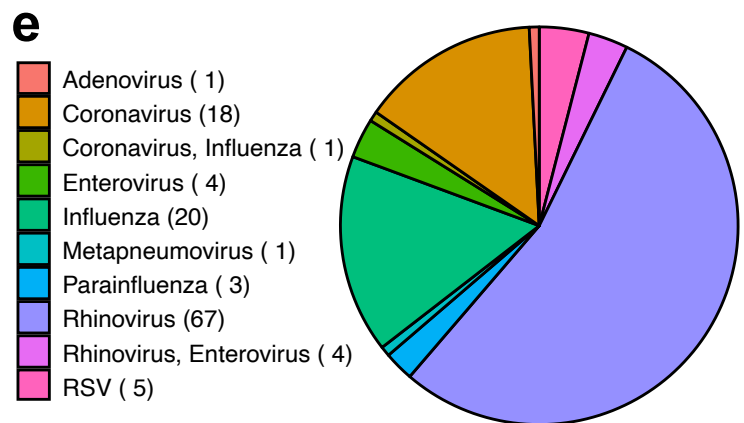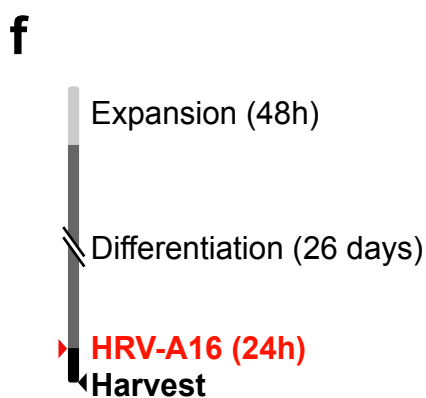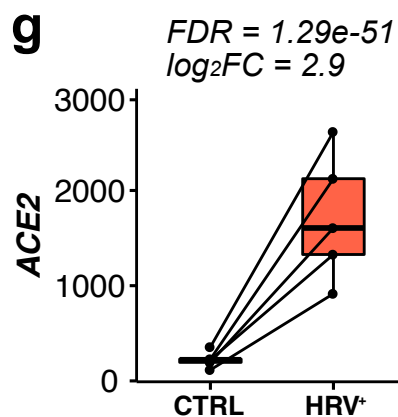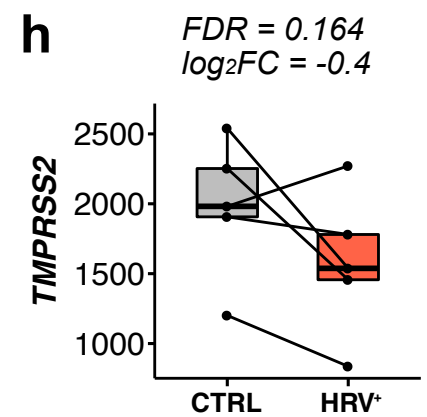

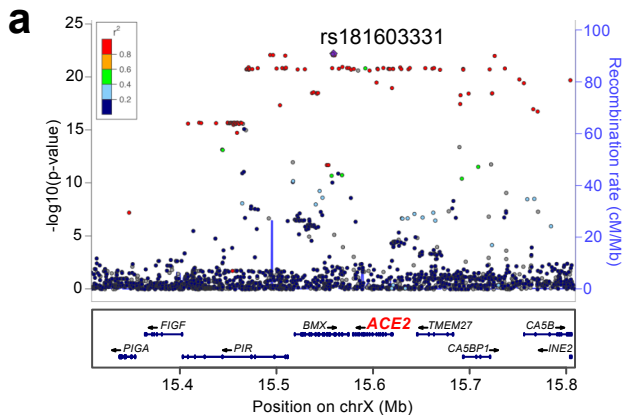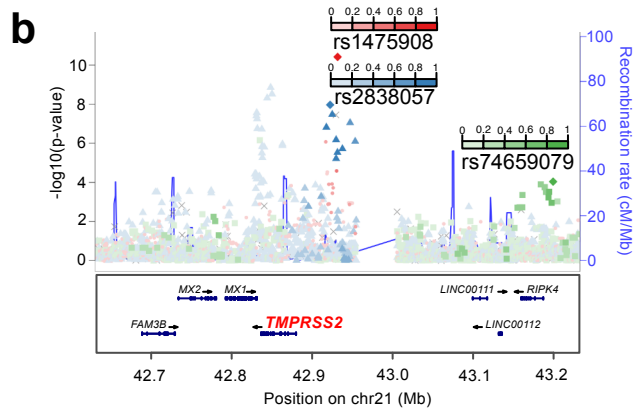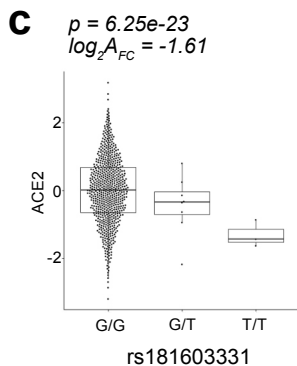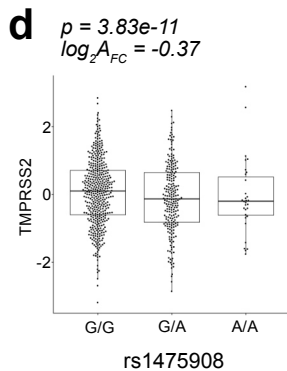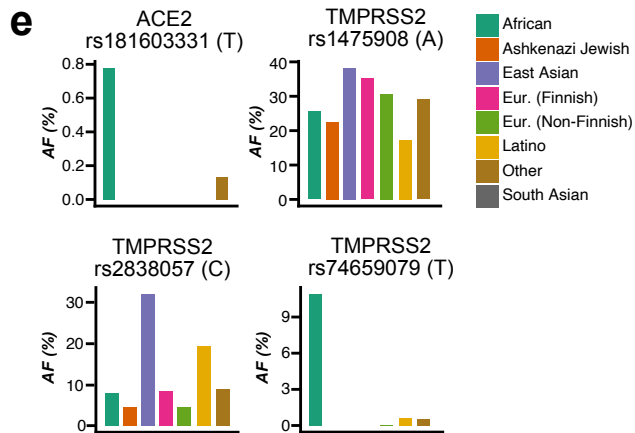

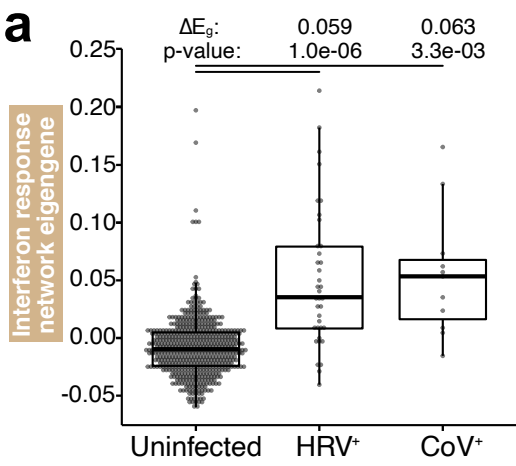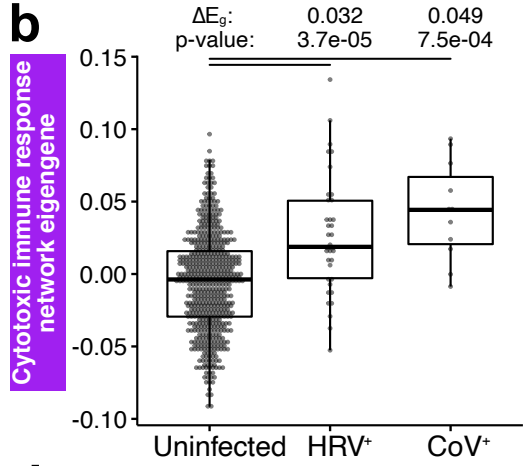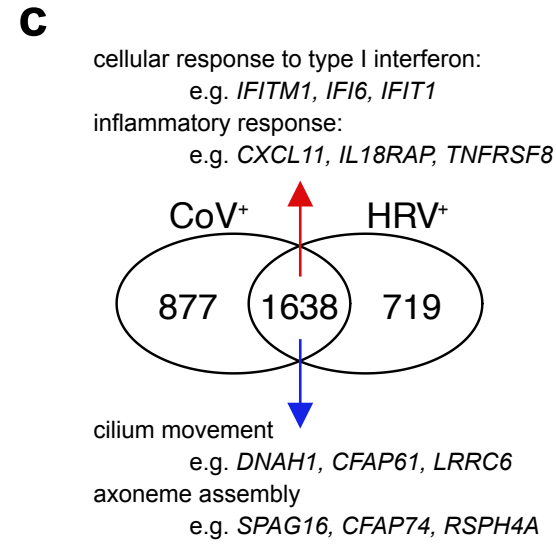

**d**

| Upstream Regulator | CoV                |                    | HRV                |                    |
|--------------------|--------------------|--------------------|--------------------|--------------------|
|                    | Activation Z-score | Enrichment p-value | Activation Z-score | Enrichment p-value |
| IFNG               | 11.73              | 4.04e-110          | 11.84              | 9.27e-141          |
| IFNA2              | 9.04               | 1.51e-75           | 8.52               | 1.40e-74           |
| STAT1              | 7.88               | 6.20e-69           | 7.84               | 9.33e-83           |
| IFNL1              | 7.55               | 2.25e-66           | 7.28               | 1.55e-59           |
| TNF                | 10.16              | 4.48e-60           | 11.88              | 1.74e-98           |
| IRF7               | 7.89               | 2.62e-54           | 8.01               | 2.40e-57           |
| STAT3              | 5.00               | 1.81e-49           | 6.15               | 1.72e-77           |
| IL10               | 2.19               | 5.44e-49           | 1.00               | 1.34e-71           |
| IL1B               | 8.95               | 1.64e-47           | 10.39              | 4.41e-79           |
| IL6                | 5.86               | 1.76e-28           | 7.32               | 1.20e-42           |

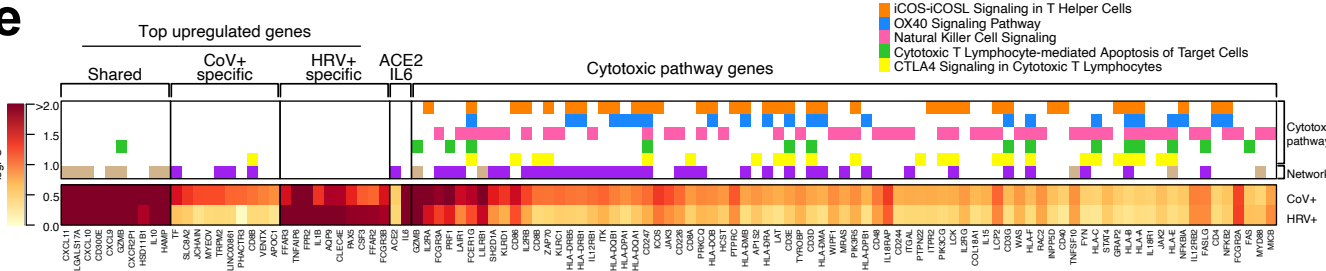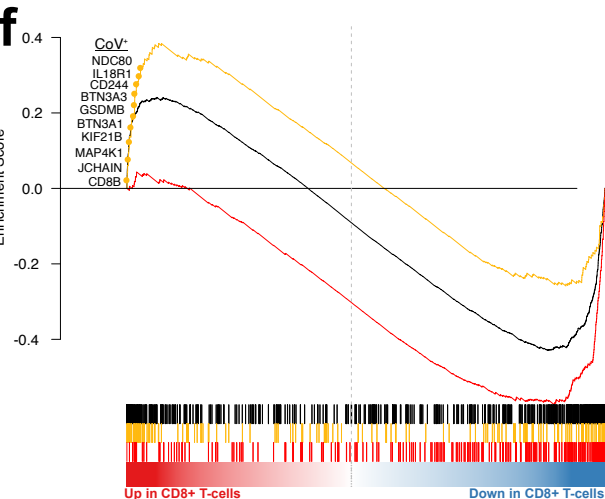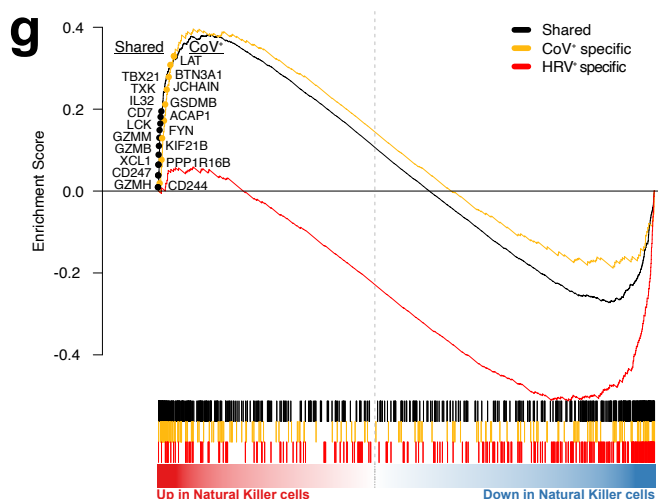

Table 1. Results for multivariate models predicting ACE2 and TMPRSS2 expression

| Model           | Predictor           |            | Partial R <sup>2</sup><br>(%) | Effect Size |       | t-test   |          |
|-----------------|---------------------|------------|-------------------------------|-------------|-------|----------|----------|
|                 | Variable            | Ref.       |                               | Coeff.      | SE    | t        | p-value  |
| <b>ACE2</b>     | Age                 | <i>n/a</i> | 1.03                          | -0.032      | 0.009 | -3.64    | 0.000300 |
|                 | Interferon Status   | Low        | 17.09                         | 1.301       | 0.088 | 14.78    | 6.50e-43 |
|                 | Type 2 Inflammation | Low        | 24.44                         | -1.001      | 0.057 | -17.68   | 1.58e-57 |
|                 | Sex                 | Male       | 0.14                          | 0.075       | 0.056 | 1.33     | 0.185421 |
|                 | Asthma              | Healthy    | 0.58                          | -0.160      | 0.059 | -2.73    | 0.006415 |
|                 | rs181603331 (G>T)   | G/G        | 1.20                          | -0.635      | 0.162 | -3.92    | 0.000097 |
| <b>TMPRSS2</b>  | Age                 | <i>n/a</i> | 0.07                          | -0.008      | 0.010 | -0.88    | 0.380112 |
|                 | Interferon Status   | Low        | 0.07                          | 0.087       | 0.098 | 0.88     | 0.378731 |
|                 | Type 2 Inflammation | Low        | 33.24                         | 1.177       | 0.063 | 18.77    | 1.74e-63 |
|                 | Sex                 | Male       | 0.02                          | -0.031      | 0.062 | -0.50    | 0.616276 |
|                 | Asthma              | Healthy    | <0.01                         | 0.014       | 0.065 | 0.22     | 0.829301 |
|                 | rs1475908 (G>A)     | G/G        | 0.22                          | -0.082      | 0.054 | -1.51    | 0.130251 |
|                 | rs74659079 (C>T)    | C/C        | 0.39                          | 0.216       | 0.107 | 2.03     | 0.043151 |
| rs2838057 (A>C) | A/A                 | 0.42       | 0.139                         | 0.066       | 2.12  | 0.034678 |          |
