# Supplementary material for: Type 2 and interferon inflammation strongly regulate SARS-CoV-2 related gene expression in the airway epithelium
Source: bioRxiv or medRxiv preprint supplement (doi:10.1101/2020.04.09.034454), 2020-04-10

**a**

p:  $9.2e^{-5}$   
 $\log_2 A_{FC}$ : 0.38

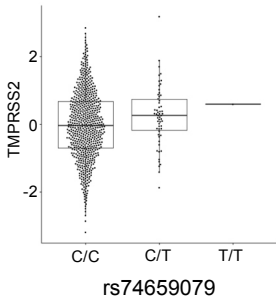**b**

p:  $1.1e^{-8}$   
 $\log_2 A_{FC}$ : 0.43

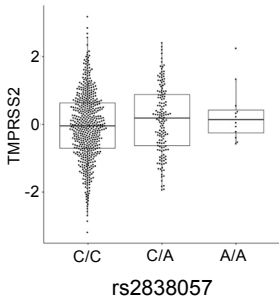

Supplement: Supplementary file [file media-5.pdf]
