# Supplementary material for: Type 2 and interferon inflammation strongly regulate SARS-CoV-2 related gene expression in the airway epithelium
Source: bioRxiv or medRxiv preprint supplement (doi:10.1101/2020.04.09.034454), 2020-04-10

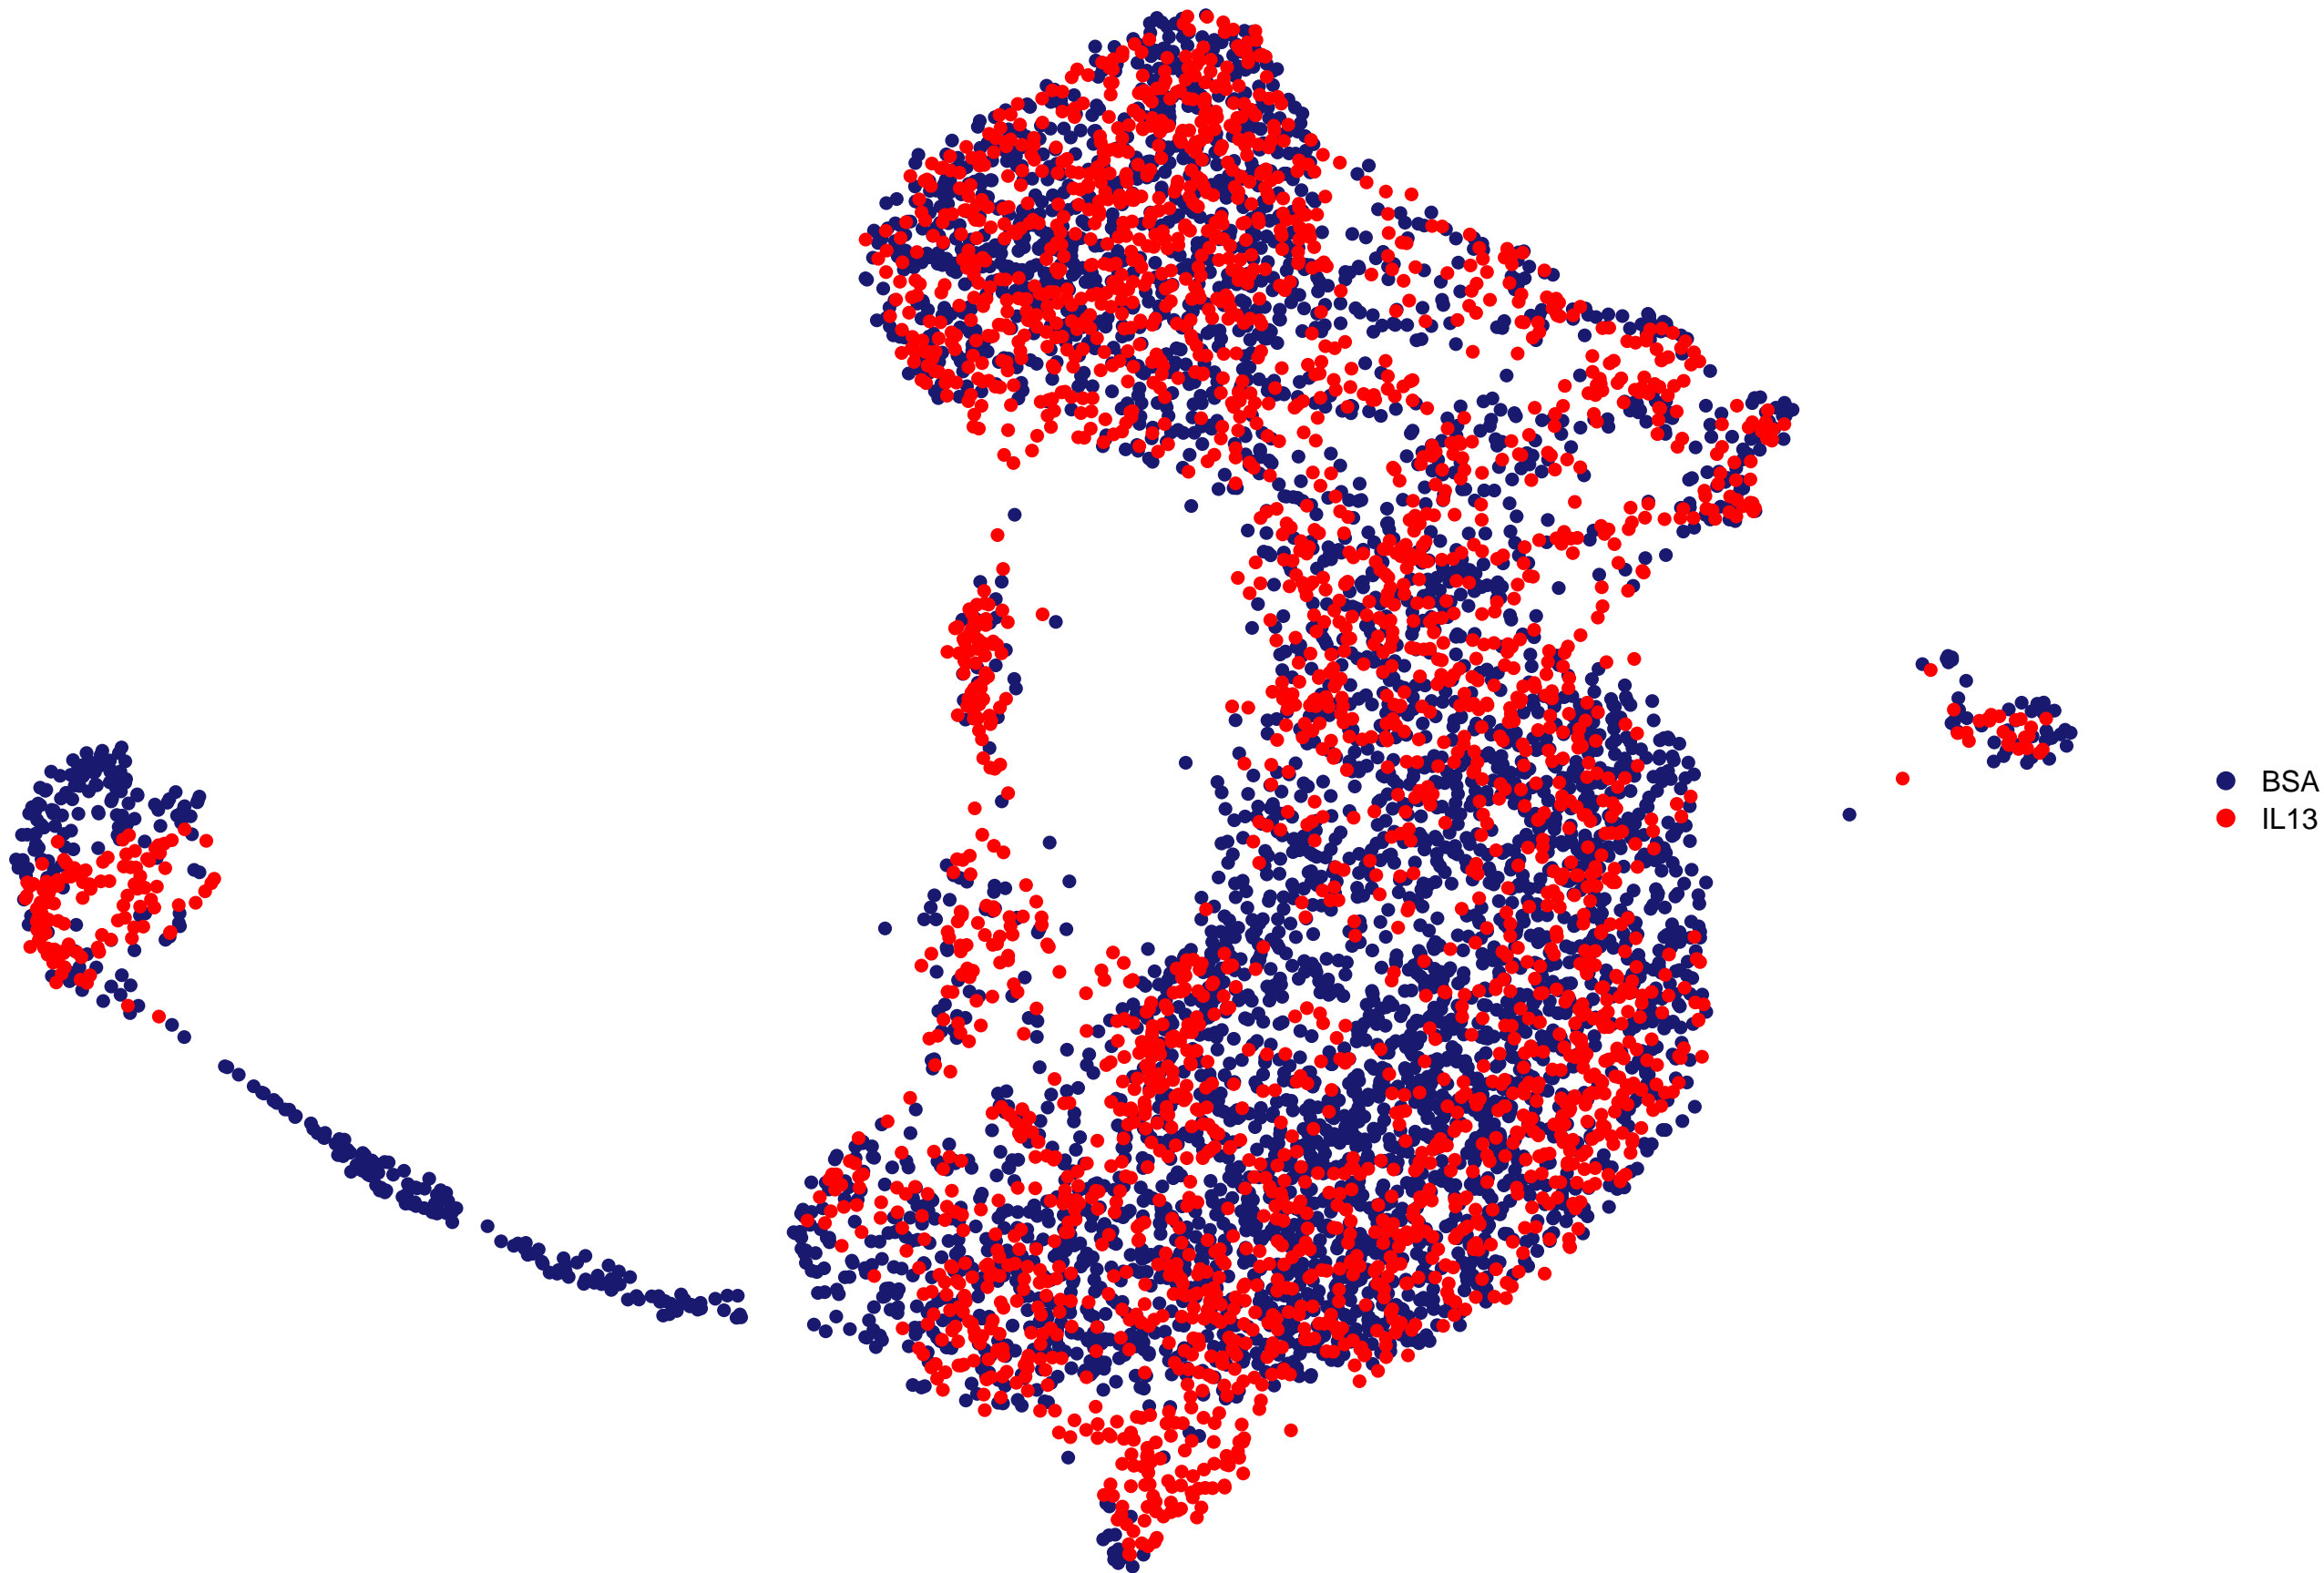

Supplement: Supplementary file [file media-6.pdf]
