# Supplementary material for: Type 2 and interferon inflammation strongly regulate SARS-CoV-2 related gene expression in the airway epithelium
Source: bioRxiv or medRxiv preprint supplement (doi:10.1101/2020.04.09.034454), 2020-04-10

Significant in:

- HRV+
- CoV+
- Both

$\log_2 \frac{\text{CoV+}}{\text{Uninfected}}$

5.0  
2.5  
0.0  
-2.5

$\log_2 \frac{\text{HRV+}}{\text{Uninfected}}$

0

2

4

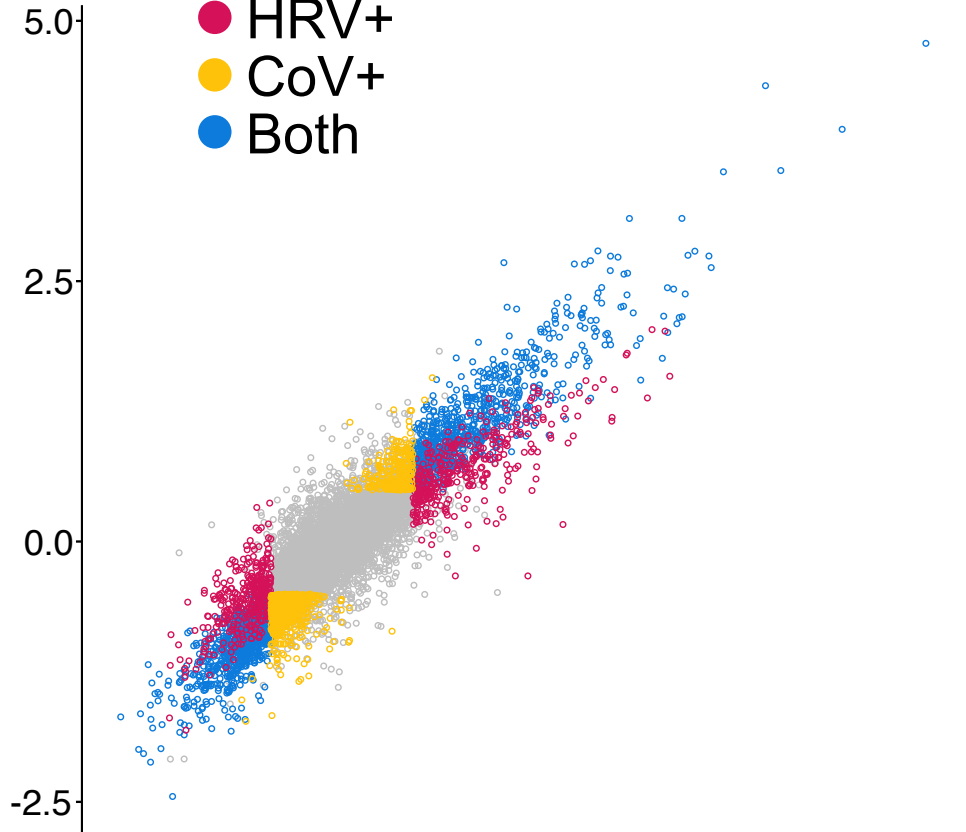

Supplement: Supplementary file [file media-7.pdf]
